# Supplementary material
Source: ML conference proceedings conference paper supplement (https://openreview.net/forum?id=kRZVz1qEqa)
Supplement: supplementary_material [file Appendix_withmain.pdf › Appendix_withmain.pdf]

# CoRT: Code-integrated Reasoning within Thinking

Anonymous Author(s)

Affiliation

Address

email

## Abstract

1 Large Reasoning Models (LRMs) like o1 and DeepSeek-R1 have shown remark-  
2 able progress in natural language reasoning with long chain-of-thought (CoT),  
3 yet they remain inefficient or inaccurate when handling complex mathematical  
4 operations. Addressing these limitations through computational tools (e.g., com-  
5 putation libraries and symbolic solvers) is promising, but it introduces a technical  
6 challenge: Code Interpreter (CI) brings external knowledge beyond the model’s  
7 internal text representations, thus the direct combination is not efficient. This  
8 paper introduces CoRT, a post-training framework for teaching LRMs to leverage  
9 CI effectively and efficiently. As a first step, we address the data scarcity issue  
10 by synthesizing code-integrated reasoning data through Hint-Engineering, which  
11 strategically inserts different hints at appropriate positions to optimize LRM-CI  
12 interaction. We manually create 30 high-quality samples, upon which we post-train  
13 models ranging from 1.5B to 32B parameters, with supervised fine-tuning, rejection  
14 fine-tuning and reinforcement learning. Our experimental results demonstrate that  
15 Hint-Engineering models achieve 4% and 8% absolute improvements on DeepSeek-  
16 R1-Distill-Qwen-32B and DeepSeek-R1-Distill-Qwen-1.5B respectively, across  
17 five challenging mathematical reasoning datasets. Furthermore, Hint-Engineering  
18 models use about 30% fewer tokens for the 32B model and 50% fewer tokens for  
19 the 1.5B model compared with the natural language models.

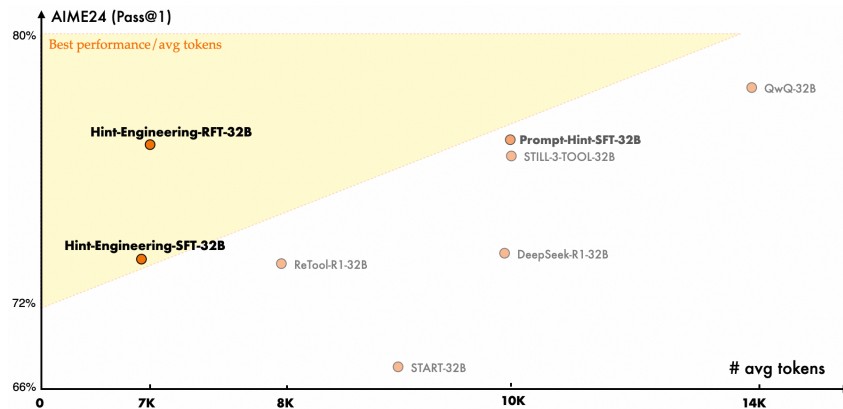

Figure 1: Performance vs. token efficiency on AIME24. The x-axis represents average token usage while the y-axis shows Pass@1 accuracy. Hint-Engineering-RFT-32B achieves comparable accuracy to other frontier models while using significantly fewer tokens.

# 1 Introduction

Benefiting from advancements in reinforcement learning (RL) techniques [1–4], Large Reasoning Models (LRMs) such as OpenAI-o1 [5], Kimi-1.5 [6], and DeepSeek-R1 [7] have achieved breakthrough progress in complex reasoning tasks. These models exhibit numerous human-like cognitive strategies with long Chain of Thought (CoT) [8, 9] reasoning, including self-refinement, self-reflection, and multi-strategy exploration. However, LRMs still demonstrate limitations in accuracy and efficiency when handling complex mathematical operations, such as precise computation and complex equation solving [10, 11], which are better suited for code interpreters (CIs). Leveraging CIs, LRMs like o3 and o4-mini [12] have substantially enhanced their mathematical reasoning capabilities.

A key open challenge is teaching LRMs when and how to effectively and efficiently use CIs to generate structured reasoning. This is a scientifically new problem, because unlike pure natural language reasoning, CIs introduce external deterministic knowledge that exists beyond the model’s internal representations. This raises critical questions: (1) How can we synthesize high-quality training data when models like o3 and o4-mini do not expose their detailed reasoning traces? (2) How to effectively coordinate between CI’s computational precision and CoT’s abstract reasoning capabilities? (3) How can the self-reflection mechanisms inherent to LRMs be reconciled with the exact external knowledge provided by CIs? These challenges are particularly acute given that effective CI integration requires teaching LRMs not only when to utilize external tools but also how to structure their reasoning.

This paper explores to answer the above questions. We begin by tackling the data synthesis challenge, which forms the foundation for post-training via supervised fine-tuning (SFT) [13], rejection fine-tuning (RFT) [14] and RL [7]. Based on the open-source LRM DeepSeek-R1, we investigate direct prompting methods like [15] for CI integration. Our key discovery is that inserting a simple hint—"Okay, let’s try to solve this problem step by step using multiple python code calls"—immediately after the model’s thinking token <think> improves code triggering rates from 50% to 90% (on 100 problems from [15]). We term this approach the *prompt-hint* method. This confirms that LRMs possess the latent capability to leverage CIs for reasoning despite being primarily trained on natural language. However, we also find that they struggle with efficient tool utilization.

It highlights a fundamental challenge: LRMs do not yet understand how to incorporate external knowledge into their reasoning processes. The two most prominent inefficiencies are **delayed code computation** (preferring text reasoning before utilizing CI) and **code result distrust** (unnecessarily verifying CI outputs manually), as shown in Figure 3. To address these limitations, we design another approach, which refers to *hint-engineering*. The key idea is to strategically inserting different hints at appropriate positions throughout the reasoning process. These hints are specifically designed to teach the LLM understand the outputs of CIs, mitigating meaningless reflection behaviors.

Following the principle that data quality outweighs quantity (less is more) [16–18], we manually generate 30 high-quality samples with human verification. Using these samples, we post-train models of varying sizes based on available computational resources. For large 32B parameter models, we conduct SFT and RFT, while RL remains computationally infeasible within our infrastructure. However, we successfully implement the complete SFT-RFT-RL pipeline for smaller models. Moreover, we carefully design outcome rewards to encourage writes the codes correctly.

Our experiments confirm the effectiveness of the above approaches. Results across five challenging mathematical reasoning datasets demonstrate that Hint-Engineering models achieve significant improvements: 4% absolute accuracy gain for DeepSeek-R1-Distill-Qwen-32B and 8% for DeepSeek-R1-Distill-Qwen-1.5B. Moreover, on the most challenging AIME benchmarks, our approach reduces token consumption by 30% for the 32B model and 50% for the 1.5B model.

To summarize, our key contributions include:

- A new data synthesis framework specifically engineered for code-integrated reasoning that effectively addresses the critical data scarcity challenge in this emerging domain.
- An efficient and scalable training pipeline that enables LLMs to acquire sophisticated code-integrated reasoning capabilities through targeted post-training procedures.
- Comprehensive empirical evaluations demonstrating significant performance and token efficiency improvements across 5 challenging mathematical benchmarks.

In the main text, we will present our main methodology and defer the related work to Appendix A.

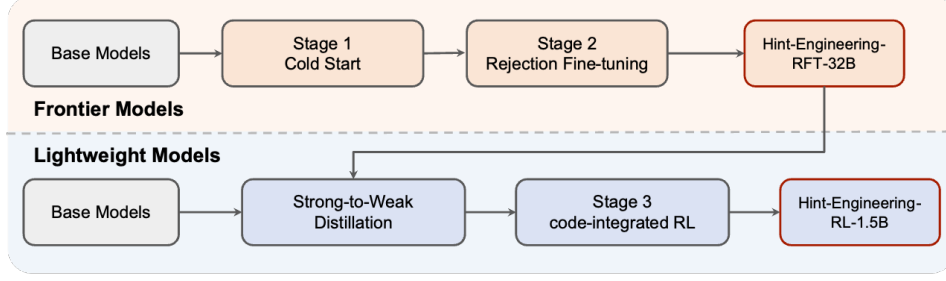

Figure 2: The training framework of CoRT.

## 2 Methodology

In this section, we introduce the CoRT framework as illustrated in Figure 2.1, encompassing the modeling of code-integrated reasoning processes, the training pipeline for 32B models (including Cold Start, SFT, and RFT), and the development of 1.5B models through strong-to-weak distillation and RL.

### 2.1 Task Formulation

By leveraging executable programs, LRMs can now perform precise calculations and complex logical operations. The framework comprises three essential components: a problem input  $P$ , a language model  $\pi$ , and an executor environment  $\mathcal{E}$ . During the reasoning process, the system constructs a sequence  $\tau_t$  at time step  $t$ , which can be represented as:

$$\tau_t = \{(n_1, p_1, o_1), \dots, (n_t, p_t, o_t)\} \quad (1)$$

Here,  $n_i$  represents the textual reasoning step,  $p_i$  denotes the program snippet generated by the model,  $o_i$  indicates the execution output, with  $i$  indexing the sequential interactions between the language model and the execution environment. The sequential reasoning process follows these steps:

$$\begin{aligned} (t_t, p_t) &= \pi(P \oplus \tau_{t-1}), o_t = \mathcal{E}(p_t) \\ \tau_t &= \tau_{t-1} \oplus n_t \oplus p_t \oplus o_t \end{aligned} \quad (2)$$

This iterative mechanism establishes a dynamic feedback loop, where each reasoning step is informed by previous computational results. The process continues until the model reaches a definitive answer.

### 2.2 Cold Start Methods

#### 2.2.1 Prompt-hint

To initiate our data generation process, we carefully crafted a prompt in Appendix E designed to instruct R1 [7] to leverage both natural language reasoning and interactive Python code execution during inference. We integrated a code interpreter that enables R1 to perform real-time interactive reasoning, as outlined in section 2.1.

Our initial observations revealed that models exhibited a relatively low probability of generating reasoning trajectories that incorporate code. Inspired by [19], we enhanced the generation process by introducing a strategic hint - "Okay, let's try to solve this problem step by step using multiple python code calls" - following the model's thinking beginning token `<think>`. This intervention significantly increased the likelihood of models producing reasoning processes that integrate codes. This approach is referred to as **prompt-hint**, with an example shown in Fig. 3 (a).

Leveraging the publicly available STILL3 [15] dataset comprising 820 math problems and R1, we employed our prompt-hint annotation method to generate 800 training instances, denoted as  $D_{\text{prompt-hint}}$ . We then performed SFT on DeepSeek-R1-Distill-Qwen-32B using this dataset, resulting in our Prompt-Hint-SFT-32B model.

#### 2.2.2 Hint-engineering

Despite the effectiveness of the prompt-hint approach, where LRMs autonomously decide when and how to utilize the Code Interpreter (CI), we identified several inefficiencies and instances of overthinking. These limitations can be categorized into two main issues:

Each face of two noncongruent parallelepipeds is a rhombus whose diagonals have lengths  $\sqrt{21}$  and  $\sqrt{31}$ . The ratio of the volume of the larger of the two polyhedra to the volume of the smaller is  $m/n$ , where  $m$  and  $n$  are relatively prime positive integers. Find  $m + n$ .

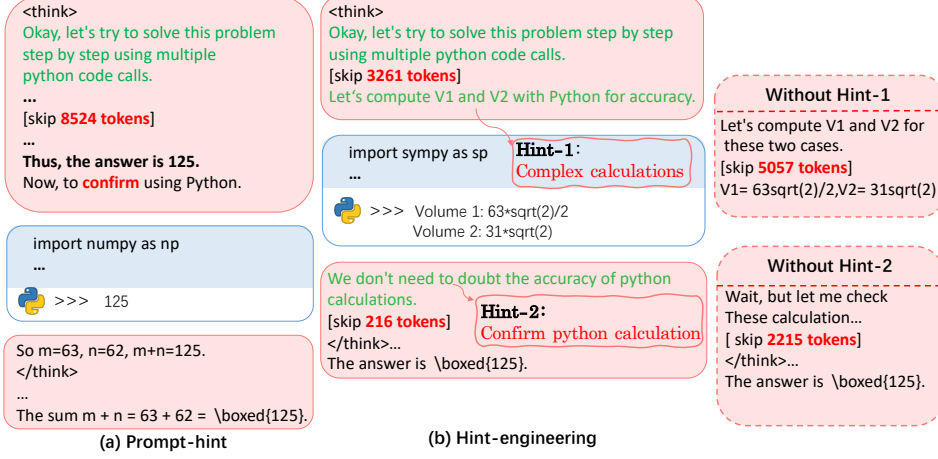

Figure 3: Comparison between prompt-hint and hint-engineering approaches using Problem 13 from AIME23 I as a case study (prompt prefix omitted for brevity). Both methods begin with a general hint (in green) after `<think>` to encourage code usage. While prompt-hint (a) allows natural interaction between R1 and the Code Interpreter (CI), leading to inefficient token usage, hint-engineering (b) introduces strategic hints at key decision points. Hint-1 is inserted when the model begins manual calculation of complex volumes (V1 and V2), redirecting to Python computation. Hint-2 is added to prevent unnecessary verification of Python calculations. Through these targeted interventions, hint-engineering achieves approximately 5000 token reduction while maintaining solution accuracy. More examples are provided in Appendix F.

109 • **Delayed code computation:** When handling complex mathematical operations, models tend to  
110 first engage in text-based reasoning before writing code and using CI for verification. This pattern  
111 often results in redundant computational steps.

112 • **Code result distrust:** Upon receiving CI execution results, models frequently display a lack of  
113 trust in the output, leading to unnecessary manual verification and redundant calculations.

114 These behavioral patterns significantly impact the model’s reasoning efficiency, particularly in terms  
115 of the number of tokens required for problem-solving.

116 To address these inefficiencies, we implement a targeted approach named **hint-engineering**. When  
117 delayed computation deferral is detected, specifically at the point where the model begins manual  
118 calculation of complex mathematical operations, we insert a strategic hint like "It looks tedious, and  
119 we can use python code to simplify the reasoning." "python". Similarly, when computational result  
120 distrust behavior emerges, we introduce the hint like "We don’t need to doubt the accuracy of python  
121 calculations." This prompt redirects the model’s focus back to the core problem rather than engaging  
122 in unnecessary verification of computational accuracy. It’s important to note that while we discourage  
123 the verification of Python’s numerical calculations, we maintain the model’s behaviour to verify the  
124 logical correctness of the code structure. Figure 3 (b) illustrates a concrete example.

125 A critical challenge in our approach was identifying suitable positions for hint insertion. While we  
126 initially attempted to automate this process using DeepSeek-v3 and R1, we found the results to be  
127 insufficiently precise. Hence, we opted for manual hint insertion with 30 problems from AIME  
128 problems before 2024 to obtain  $D_{Hint-engineering-SFT}$  and Hint-Engineering-SFT-32B.

129 To further enhance model performance, we conducted rejection fine-tuning(RFT) using the Hint-  
130 Engineering-SFT-32B model on the 820 problems from STILL3. Specifically, we performed multiple  
131 sampling iterations on each problem and implemented a filtering process to eliminate trajectories  
132 with incorrect final answers, as well as those exhibiting delayed code computation or code result  
133 distrust behaviors. We combined the filtered trajectories with  $D_{Hint-engineering-SFT}$  to create  
134  $D_{Hint-engineering-RFT}$ , a dataset of 830 examples. This curated dataset was then used to fine-tune  
135 DeepSeek-R1-Distill-Qwen-32B, resulting in our Hint-Engineering-RFT-32B model.

## 2.3 Strong-to-weak Distillation

Given the computational constraints of our infrastructure in performing reinforcement learning on 32B-parameter code-integrated LRMs, we distilled both Prompt-Hint-SFT-32B and Hint-Engineering-RFT-32B models into DeepSeek-R1-Distill-Qwen-1.5B for RL experimentation. This process yielded two smaller models: Prompt-Hint-1.5B-SFT and Hint-Engineering-SFT-1.5B, which served as the foundation for our reinforcement learning exploration. We selected and preprocessed 10k examples from publicly available datasets for distillation, with detailed procedures provided in Appendix G.

## 2.4 Code-integrated Reinforcement Learning

We conduct reinforcement learning on Prompt-Hint-1.5B-SFT and Hint-Engineering-SFT-1.5B models with GRPO [3] algorithm. We mainly want to answer the following two questions through some series of reinforcement learning experiments.

- Whether models can enhance their reasoning capabilities through RL after acquiring code-integrated reasoning skills via SFT?
- How the models’ interaction patterns with the Code Interpreter evolve during the RL process?

In applying the GRPO algorithm to our models, we introduced several modifications to the standard text-based GRPO framework:

- **Rollout with Code Interpreter:** We enable multiple model-CI interactions during the RL rollout process, as described in Section 2.1. To manage computational overhead during rollouts, we implement a maximum tool usage limit  $T$ . Once this limit is reached, we append a hint informing the model to proceed without further Python usage.
- **Persistent Execution Environment:** Unlike traditional TIR environments that execute each Python block independently, we construct a Jupyter-like environment where variables, environments, and functions persist across code blocks, enhancing code efficiency and reducing errors.
- **Output Masking:** To ensure training stability, we implement execution result masking, significantly reducing model collapse probability during training. This crucial modification prevents potential training failures that would otherwise occur without such masking.
- **Reward Design:** We implement a dual reward system comprising accuracy reward and code execution reward as defined in Equations 3. For accuracy assessment, we require models to present final answers in a specified format (e.g., within boxed{ }), enabling reliable rule-based verification against ground truth answers. To prevent infinite loops resulting from repeated code failures, we implement a code execution penalty for responses where all code execution attempts fail. The total reward  $R$  is computed as a weighted sum of these two components, where  $\omega$  controls the contribution of the code execution penalty.

$$R_a = \begin{cases} 1 & \text{if answers match} \\ 0 & \text{otherwise} \end{cases} \quad R_c = \begin{cases} -1 & \text{if all codes fail} \\ 0 & \text{otherwise} \end{cases} \quad R = R_a + \omega R_c \quad (3)$$

## 3 Experiments

In this section, we evaluate the effectiveness of our proposed CoRT framework through comprehensive experiments on five challenging mathematical reasoning benchmarks: (1) AIME24, (2) AIME25, (3) AMC23, (4) MATH500, and (5) OlympiadBench. Comprehensive descriptions of the evaluation datasets are provided in Appendix C. For space saving, our implementation details of SFT, RFT, RL and inference are listed in Appendix B. Due to space constraints, we present only representative experimental results in the main text, with comprehensive results available in Appendix D. Moreover, the baseline models are described in Appendix H.

### 3.1 Main Results

Table 1 presents our main results, comparing our models with state-of-the-art baselines across multiple mathematical reasoning benchmarks. We organize the results into three sections: SOTA Models, Frontier Models (32B), and Lightweight Models (1.5B).

For 32B models, we observe that after SFT, our models achieve performance comparable to existing tool-integrated models, with Prompt-Hint-SFT-32B slightly outperforming others with an average accuracy of 81.8% across benchmarks. Notably, Hint-Engineering-RFT-32B, despite being trained

Table 1: Performance comparison of different math reasoning models across benchmarks. For each section, best results are shown in **bold** and second-best results are underlined. During inference, we set temperature 0.6 and top<sub>p</sub> 0.95. Results for AIME24, AIME25, and AMC23 are averaged over 16 samples, while MATH500 and Olympiad results are averaged over 4 samples. All experiments use a maximum sequence length of 32,768 tokens and limit tool usage to 15 calls.

| Model                            | Tool-Use | Stage   | AIME24      | AIME25      | AMC23       | MATH500     | Olympiad    | Avg         |
|----------------------------------|----------|---------|-------------|-------------|-------------|-------------|-------------|-------------|
| <i>SOTA Models</i>               |          |         |             |             |             |             |             |             |
| o1                               | ✗        | unknown | 74.3        | <b>79.2</b> | -           | 96.4        | -           | -           |
| DeepSeek-R1                      | ✗        | RL      | <b>79.8</b> | <u>70.0</u> | -           | <b>97.3</b> | -           | -           |
| QwQ-32B                          | ✗        | unknown | <u>79.5</u> | 65.3        | <b>94.3</b> | 92.3        | <b>79.7</b> | <b>82.2</b> |
| <i>Frontier Models (32B)</i>     |          |         |             |             |             |             |             |             |
| DeepSeek-R1-32B                  | ✗        | SFT     | 72.9        | 59.0        | 88.8        | 94.3        | 72.5        | 77.5        |
| START-32B                        | ✓        | SFT     | 66.7        | 47.1        | <b>95.0</b> | 94.4        | -           | -           |
| STILL-3-TOOL-32B                 | ✓        | SFT     | <u>76.7</u> | 64.4        | 91.3        | <b>96.6</b> | <b>75.9</b> | 81.0        |
| ReTool-R1-32B                    | ✓        | RL      | 72.5        | 54.3        | 92.9        | 94.3        | 69.2        | 76.6        |
| Prompt-Hint-SFT-32B              | ✓        | SFT     | <b>77.3</b> | <u>65.0</u> | <b>95.0</b> | <b>96.6</b> | <u>75.1</u> | <b>81.8</b> |
| Hint-Engineering-SFT-32B         | ✓        | SFT     | 72.1        | 60.2        | 91.3        | 94.4        | 71.2        | 77.8        |
| Hint-Engineering-RFT-32B         | ✓        | RFT     | <u>76.7</u> | <b>67.1</b> | <u>94.4</u> | <u>95.1</u> | 73.4        | <u>81.3</u> |
| <i>Lightweight Models (1.5B)</i> |          |         |             |             |             |             |             |             |
| DeepSeek-R1-1.5B                 | ✗        | SFT     | 28.8        | 21.8        | 62.9        | 83.9        | 43.3        | 48.1        |
| DeepScaleR-1.5B-Preview          | ✗        | RL      | 40.0        | <u>30.0</u> | <u>73.6</u> | <b>87.8</b> | 50.0        | 56.3        |
| ToRL-1.5B                        | ✓        | RL      | 26.7        | <u>26.7</u> | <u>67.5</u> | 77.8        | 44.0        | 48.5        |
| Prompt-Hint-1.5B-SFT             | ✓        | SFT     | 30.6        | 25.0        | 63.1        | 83.3        | 50.4        | 50.5        |
| Prompt-Hint-1.5B-RL              | ✓        | RL      | <b>43.1</b> | <b>30.2</b> | <b>73.8</b> | <u>87.3</u> | <b>57.1</b> | <b>58.3</b> |
| Hint-Engineering-1.5B-SFT        | ✓        | SFT     | 34.0        | 23.5        | 64.6        | 84.2        | 49.8        | 51.2        |
| Hint-Engineering-1.5B-RL         | ✓        | RL      | <u>41.0</u> | 29.4        | 70.0        | 85.8        | <u>55.6</u> | <u>56.4</u> |

on just 30 manually annotated examples initially, achieves competitive performance with an average accuracy of 81.3%. This highlights the effectiveness of our rejection fine-tuning approach and the importance of high-quality data over quantity.

For 1.5B models, the reinforcement learning stage brings substantial improvements. Prompt-Hint-1.5B-RL achieves state-of-the-art performance among lightweight models with an average accuracy of 58.3%, outperforming the non-tool-using DeepScaleR-1.5B-Preview. Similarly, Hint-Engineering-1.5B-RL shows strong performance at 56.4%. The dramatic improvement from SFT to RL stages (approximately 8% absolute gain) demonstrates the effectiveness of our reinforcement learning approach for tool-integrated reasoning.

### 3.2 Token Efficiency Analysis

Beyond raw performance, we analyze the token efficiency of our models. Token efficiency can be roughly estimated by dividing the model’s accuracy by its average token consumption. Figures 1 and 4 illustrate this analysis, revealing several key insights:

- **Superior Efficiency of Hint-Engineering:** At equivalent performance levels, Hint-Engineering series models demonstrate the highest token efficiency. For example, as shown in Figure 1, Hint-Engineering-RFT-32B achieves the same performance as QwQ-32B while using 50% fewer tokens (7K vs 14K). Comparing Hint-Engineering-SFT-32B with R1-distill-32B, with just 30 training examples for fine-tuning, the model reduces token consumption by approximately 30% while maintaining comparable performance. As observed from the inference token budget analysis in Figure 4 (a), Hint-Engineering achieves superior performance compared to Prompt-Hint under limited token budgets, while Prompt-Hint shows no significant advantage over CoT in these constrained conditions.
- **Low Token Usage for both Correct and Incorrect Responses:** As shown in Figure 4 (b), compared to CoT and Prompt-Hint approaches, Hint-Engineering reduces token consumption in both correct and incorrect responses, indicating that it not only solves problems efficiently but also minimizes token waste during unsuccessful attempts. This improvement stems from Hint-Engineering’s fundamental design: increasing the utilization of code for computations and enhancing confidence in code execution results.



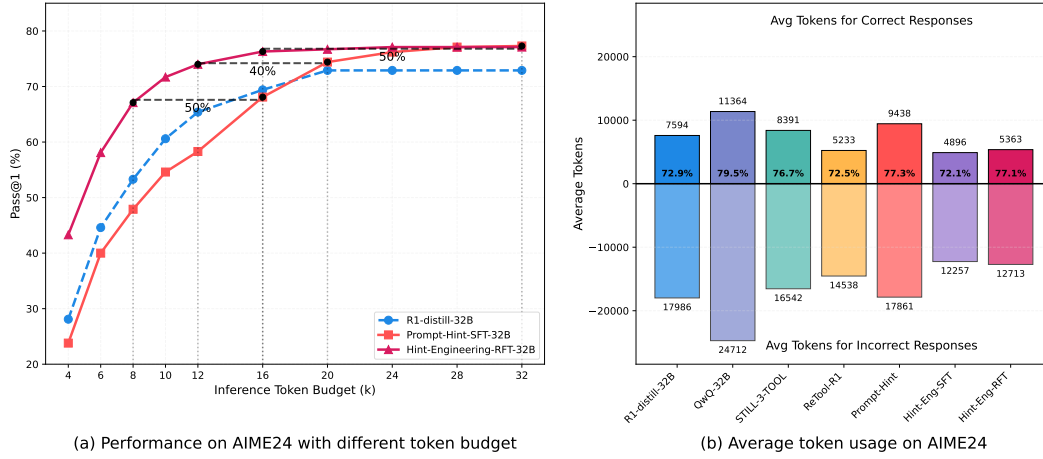

Figure 4: Token efficiency analysis on AIME24. (a): Token efficiency comparison showing Hint-Engineering-RFT-32B achieves comparable accuracy with significantly fewer tokens (40-50% token saving) compared to Prompt-Hint-SFT-32B. (b): Average token usage for correct and incorrect responses across different models, with Hint-Engineering models maintaining lower token consumption while achieving competitive performance.

As shown in Figure 1, when plotting performance against token usage, Hint-Engineering-RFT-32B sits in the optimal region with high performance and low token consumption, demonstrating the best performance-to-efficiency ratio among all compared models.

### 3.3 Code Behavior Analysis between Prompt-Hint and Hint-Engineering

We first establish a taxonomy for Python code usage based on two dimensions. From the perspective of reasoning relationship, we categorize code usage into **Calculation** (computing results not present in the current reasoning chain) and **Verification** (validating results derived from chain-of-thought reasoning). In terms of specific functionality, we classify code into categories including Solving Equations, Numerical Approximation, Pattern Recognition, Combinatorial Enumeration and so on.

We conduct a comprehensive analysis of Python code usage patterns across all test sets, comparing Prompt-Hint-SFT-32B and Hint-Engineering-RFT-32B, two models with comparable overall performance. We employ DeepSeek-V3 to classify Python code functionality, with the corresponding classification prompts detailed in Appendix E.

Figure 5 provides a qualitative analysis of the code behavior patterns in our different approaches. The most striking difference is in how the models utilize code:

- **Prompt-Hint Approach:** Code is predominantly used for verification purposes (68.2%), with only 31.8% dedicated to actual computational tasks. This indicates an inefficient utilization pattern where the model performs calculations in natural language and then uses code primarily to verify these calculations.
- **Hint-Engineering Approach:** Shows a much more balanced usage, with 51.1% of code dedicated to direct calculation and 48.9% for verification. This more optimal distribution reflects the model’s understanding of when to leverage computational tools versus when to rely on reasoning.

Additionally, the Hint-Engineering approach shows greater diversity in the types of computational operations performed, including symbolic mathematics, equation solving, and combinatorial enumeration. This suggests that the model has developed a more sophisticated understanding of the appropriate use cases for different types of code operations.

As shown in Figure 5, Prompt-Hint and Hint-Engineering exhibit distinct code-integrated Reasoning patterns. Prompt-Hint demonstrates a strong preference for verification (82.4%), while Hint-Engineering maintains a relatively balanced distribution between calculation and verification (approximately 50% each). This balanced distribution emerges from the interplay between our Hint-Engineering design, which encourages computational efficiency, and the model’s inherent

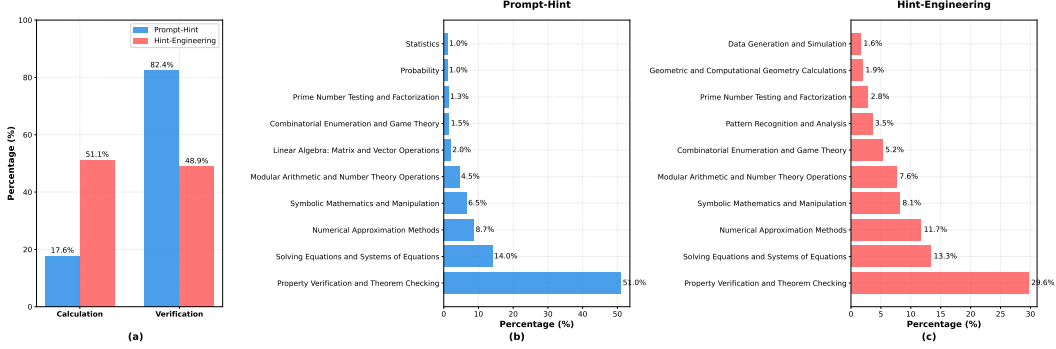

Figure 5: Analysis of Python code usage patterns. (a) Distribution of code usage types: Hint-Engineering shows a preference for calculation while Prompt-Hint favors verification tasks. (b) and (c) Function-specific distribution: Hint-Engineering demonstrates more balanced usage across different Python functions compared to Prompt-Hint.

RL Training with vs. without Code Reward on AIME24

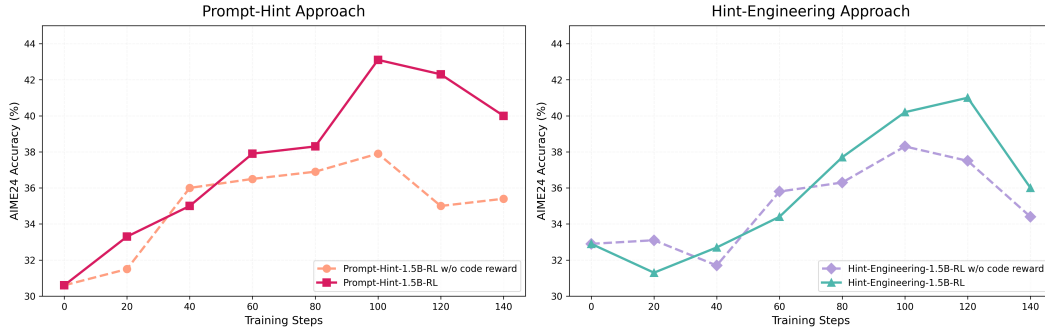

Figure 6: Ablation study on the impact of code execution reward during RL training on AIME24. Left: Performance of Prompt-Hint-1.5B-RL with and without code reward. Right: Performance of Hint-Engineering-1.5B-RL with and without code reward. Both approaches show consistent performance improvements when trained with the additional code execution reward.

tendency toward verification in long chain-of-thought reasoning. Regarding specific mathematical functionalities, we observe that Property Verification and Theorem Checking dominates Prompt-Hint’s code usage (51%), whereas Hint-Engineering exhibits a more uniform distribution across different functions. Interestingly, both approaches share the same top-5 most frequently used Python functions, suggesting the influence of the test sets’ mathematical domains. Moreover, we present representative examples in Appendix F.

### 3.4 Impact of Code Reward in RL

Figure 6 presents an ablation study on the effect of incorporating code execution reward into the RL process. We set the code reward ratio  $\omega = 0.1$  here. The results demonstrate that incorporating this code reward consistently improves performance for both approaches:

- **For Prompt-Hint:** Models trained with code reward achieve up to 5% higher accuracy than those without, reaching a peak of 43.1% versus 37.9%.
- **For Hint-Engineering:** A similar pattern emerges with approximately 3% performance improvement, reaching 41.0% versus 38.3%.

Notably, we found that the magnitude of this reward is crucial: a modest code reward ratio  $\omega = 0.1$  provides optimal results, while stronger penalties (e.g., 0.5) degraded performance. This suggests that while encouraging code correctness is valuable, overly penalizing experimental code attempts can inhibit the model’s exploration and learning. Additional experimental results can be found in Appendix D.



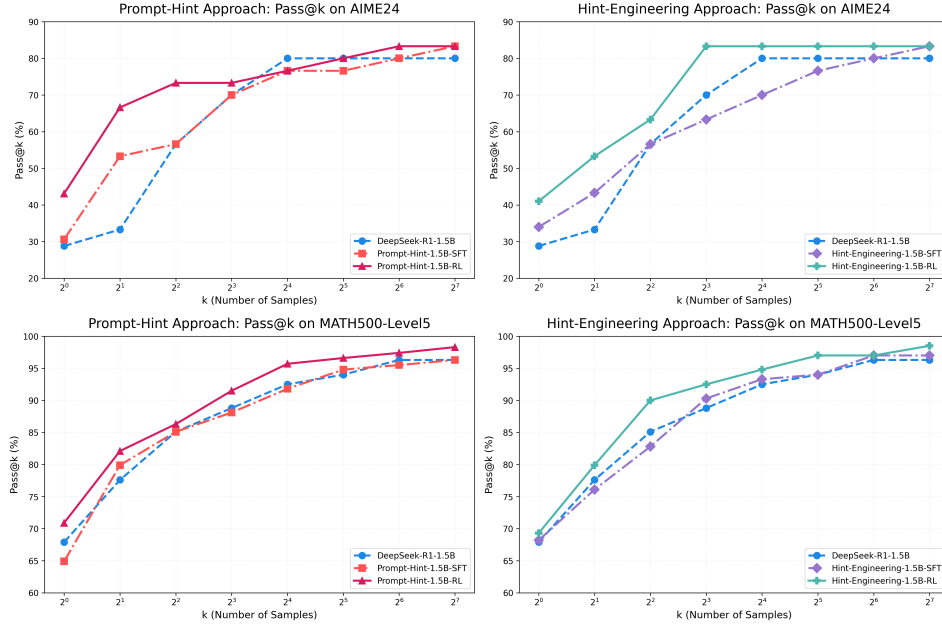

Figure 7: Pass@k performance on AIME24 (top) and MATH500-Level5 (bottom) for both Prompt-Hint (left) and Hint-Engineering (right). The analysis compares the base model DeepSeek-R1-1.5B with SFT and RL variants. While SFT does not significantly improve the Pass@k upper bound, RL substantially elevates performance across all k values, particularly at lower sampling budgets.

### 3.5 Pass@K Analysis

Figure 7 illustrates the performance of our models as a function of sample size ( $k$ ) on both AIME24 and MATH500-Level5 datasets. Several important patterns emerge:

- **SFT Impact on Reasoning Ceiling:** Supervised fine-tuning alone does not significantly raise the Pass@k upper bound for either approach. This suggests that while SFT can teach the model format and basic tool usage, it doesn't fundamentally enhance the model's reasoning capabilities for 1.5B size model with the selected 10k problems.
- **RL Significantly Raises Performance Ceiling:** Both Prompt-Hint-1.5B-RL and Hint-Engineering-1.5B-RL show substantially higher Pass@k curves than their SFT counterparts, particularly at lower k values. This indicates that reinforcement learning successfully improves not just the average performance but the model's ability to consistently arrive at correct solutions with fewer attempts.

These observations confirm that RL effectively amplifying the benefits of the more optimal code usage patterns established during the Hint-Engineering training.

Additional interesting findings, such as the impact of problem difficulty on RL performance and the evolution of code behavior during RL training, are documented in Appendix D.

## 4 Conclusion

Our experiments reveal that properly integrated code tools enhance mathematical reasoning across model scales. High-quality data with optimal code behavior patterns can match or exceed the performance of larger datasets, while reinforcement learning significantly improves performance beyond SFT, particularly for smaller models. The Hint-Engineering approach achieves remarkable efficiency, reducing token usage by 30-50% while maintaining competitive performance. Moreover, RL shapes code usage behavior toward either efficiency or increased integration. These findings demonstrate that combining high-quality data curation, targeted fine-tuning, and reinforcement learning with carefully designed rewards effectively enhances mathematical reasoning capabilities through tool integration.

## References

- [1] John Schulman, Filip Wolski, Prafulla Dhariwal, Alec Radford, and Oleg Klimov. Proximal policy optimization algorithms. *arXiv preprint arXiv:1707.06347*, 2017.
- [2] Ziniu Li, Tian Xu, Yushun Zhang, Zhihang Lin, Yang Yu, Ruoyu Sun, and Zhi-Quan Luo. Remax: A simple, effective, and efficient reinforcement learning method for aligning large language models. In *Forty-first International Conference on Machine Learning*, 2024.
- [3] Zhihong Shao, Peiyi Wang, Qihao Zhu, Runxin Xu, Junxiao Song, Xiao Bi, Haowei Zhang, Mingchuan Zhang, YK Li, Y Wu, et al. Deepseekmath: Pushing the limits of mathematical reasoning in open language models. *arXiv preprint arXiv:2402.03300*, 2024.
- [4] Nathan Lambert, Jacob Morrison, Valentina Pyatkin, Shengyi Huang, Hamish Ivison, Faeze Brahman, Lester James V Miranda, Alisa Liu, Nouha Dziri, Shane Lyu, et al. Tulu 3: Pushing frontiers in open language model post-training. *arXiv preprint arXiv:2411.15124*, 2024.
- [5] OpenAI. Learning to reason with llms. <https://openai.com/index/learning-to-reason-with-llms/>, 2024.
- [6] Kimi Team, Angang Du, Bofei Gao, Bowei Xing, Changjiu Jiang, Cheng Chen, Cheng Li, Chenjun Xiao, Chenzhuang Du, Chonghua Liao, et al. Kimi k1. 5: Scaling reinforcement learning with llms. *arXiv preprint arXiv:2501.12599*, 2025.
- [7] Daya Guo, Dejian Yang, Haowei Zhang, Junxiao Song, Ruoyu Zhang, Runxin Xu, Qihao Zhu, Shitong Ma, Peiyi Wang, Xiao Bi, et al. Deepseek-r1: Incentivizing reasoning capability in llms via reinforcement learning. *CoRR*, abs/2501.12948, 2025.
- [8] Jason Wei, Xuezhi Wang, Dale Schuurmans, Maarten Bosma, Fei Xia, Ed Chi, Quoc V Le, Denny Zhou, et al. Chain-of-thought prompting elicits reasoning in large language models. *Advances in neural information processing systems*, 35:24824–24837, 2022.
- [9] Siwei Wu, Zhongyuan Peng, Xinrun Du, Tuney Zheng, Minghao Liu, Jialong Wu, Jiachen Ma, Yizhi Li, Jian Yang, Wangchunshu Zhou, et al. A comparative study on reasoning patterns of openai’s o1 model. *arXiv preprint arXiv:2410.13639*, 2024.
- [10] Zhibin Gou, Zhihong Shao, Yeyun Gong, Yelong Shen, Yujiu Yang, Minlie Huang, Nan Duan, and Weizhu Chen. Tora: A tool-integrated reasoning agent for mathematical problem solving. *arXiv preprint arXiv:2309.17452*, 2023.
- [11] Yancheng He, Shilong Li, Jiaheng Liu, Weixun Wang, Xingyuan Bu, Ge Zhang, Zhongyuan Peng, Zhaoxiang Zhang, Zhicheng Zheng, Wenbo Su, et al. Can large language models detect errors in long chain-of-thought reasoning? *arXiv preprint arXiv:2502.19361*, 2025.
- [12] OpenAI. Introducing openai o3 and o4-mini, 2025. URL <https://openai.com/index/introducing-o3-and-o4-mini/>.
- [13] Ziniu Li, Congliang Chen, Tian Xu, Zeyu Qin, Jiancong Xiao, Zhi-Quan Luo, and Ruoyu Sun. Preserving diversity in supervised fine-tuning of large language models. In *The Thirteenth International Conference on Learning Representations*, 2025.
- [14] Zheng Yuan, Hongyi Yuan, Chengpeng Li, Guanting Dong, Keming Lu, Chuanqi Tan, Chang Zhou, and Jingren Zhou. Scaling relationship on learning mathematical reasoning with large language models, 2023. URL <https://arxiv.org/abs/2308.01825>.
- [15] Zhipeng Chen, Yingqian Min, Beichen Zhang, Jie Chen, Jinhao Jiang, Daixuan Cheng, Wayne Xin Zhao, Zheng Liu, Xu Miao, Yang Lu, et al. An empirical study on eliciting and improving r1-like reasoning models. *arXiv preprint arXiv:2503.04548*, 2025.
- [16] Chunting Zhou, Pengfei Liu, Puxin Xu, Srinivasan Iyer, Jiao Sun, Yuning Mao, Xuezhe Ma, Avia Efrat, Ping Yu, Lili Yu, et al. Lima: Less is more for alignment. *Advances in Neural Information Processing Systems*, 36:55006–55021, 2023.

- [17] Niklas Muennighoff, Zitong Yang, Weijia Shi, Xiang Lisa Li, Li Fei-Fei, Hannaneh Hajishirzi, Luke Zettlemoyer, Percy Liang, Emmanuel Candès, and Tatsunori Hashimoto. s1: Simple test-time scaling. *arXiv preprint arXiv:2501.19393*, 2025.
- [18] Yixin Ye, Zhen Huang, Yang Xiao, Ethan Chern, Shijie Xia, and Pengfei Liu. Limo: Less is more for reasoning. *arXiv preprint arXiv:2502.03387*, 2025.
- [19] Chengpeng Li, Mingfeng Xue, Zhenru Zhang, Jiaxi Yang, Beichen Zhang, Xiang Wang, Bowen Yu, Binyuan Hui, Junyang Lin, and Dayiheng Liu. Start: Self-taught reasoner with tools. *arXiv preprint arXiv:2503.04625*, 2025.
- [20] Karl Cobbe, Vineet Kosaraju, Mohammad Bavarian, Mark Chen, Heewoo Jun, Lukasz Kaiser, Matthias Plappert, Jerry Tworek, Jacob Hilton, Reiichiro Nakano, et al. Training verifiers to solve math word problems. *arXiv preprint arXiv:2110.14168*, 2021.
- [21] Dan Hendrycks, Collin Burns, Saurav Kadavath, Akul Arora, Steven Basart, Eric Tang, Dawn Song, and Jacob Steinhardt. Measuring mathematical problem solving with the math dataset. *arXiv preprint arXiv:2103.03874*, 2021.
- [22] Hunter Lightman, Vineet Kosaraju, Yuri Burda, Harrison Edwards, Bowen Baker, Teddy Lee, Jan Leike, John Schulman, Ilya Sutskever, and Karl Cobbe. Let’s verify step by step. In *The Twelfth International Conference on Learning Representations*, 2023.
- [23] Jie Huang and Kevin Chen-Chuan Chang. Towards reasoning in large language models: A survey. *arXiv preprint arXiv:2212.10403*, 2022.
- [24] Aske Plaat, Annie Wong, Suzan Verberne, Joost Broekens, Niki van Stein, and Thomas Back. Reasoning with large language models, a survey. *arXiv preprint arXiv:2407.11511*, 2024.
- [25] Fengli Xu, Qianyu Hao, Zefang Zong, Jingwei Wang, Yunke Zhang, Jingyi Wang, Xiaochong Lan, Jiahui Gong, Tianjian Ouyang, Fanjin Meng, et al. Towards large reasoning models: A survey of reinforced reasoning with large language models. *arXiv preprint arXiv:2501.09686*, 2025.
- [26] Ashish Vaswani, Noam Shazeer, Niki Parmar, Jakob Uszkoreit, Llion Jones, Aidan N Gomez, Łukasz Kaiser, and Illia Polosukhin. Attention is all you need. *Advances in neural information processing systems*, 30, 2017.
- [27] Guhao Feng, Bohang Zhang, Yuntian Gu, Haotian Ye, Di He, and Liwei Wang. Towards revealing the mystery behind chain of thought: a theoretical perspective. *Advances in Neural Information Processing Systems*, 36:70757–70798, 2023.
- [28] Haipeng Luo, Qingfeng Sun, Can Xu, Pu Zhao, Jianguang Lou, Chongyang Tao, Xiubo Geng, Qingwei Lin, Shifeng Chen, and Dongmei Zhang. Wizardmath: Empowering mathematical reasoning for large language models via reinforced evol-instruct. *arXiv preprint arXiv:2308.09583*, 2023.
- [29] Zhangir Azerbayev, Hailey Schoelkopf, Keiran Paster, Marco Dos Santos, Stephen McAleer, Albert Q Jiang, Jia Deng, Stella Biderman, and Sean Welleck. Llemma: An open language model for mathematics. *arXiv preprint arXiv:2310.10631*, 2023.
- [30] Longhui Yu, Weisen Jiang, Han Shi, Jincheng Yu, Zhengying Liu, Yu Zhang, James T. Kwok, Zhenguo Li, Adrian Weller, and Weiyang Liu. Metamath: Bootstrap your own mathematical questions for large language models, 2023.
- [31] Weihao Zeng, Yuzhen Huang, Qian Liu, Wei Liu, Keqing He, Zejun Ma, and Junxian He. Simplerl-zoo: Investigating and taming zero reinforcement learning for open base models in the wild. *arXiv preprint arXiv:2503.18892*, 2025.
- [32] Zichen Liu, Changyu Chen, Wenjun Li, Penghui Qi, Tianyu Pang, Chao Du, Wee Sun Lee, and Min Lin. Understanding rl-zero-like training: A critical perspective. *arXiv preprint arXiv:2503.20783*, 2025.

- [33] Richard Yuanzhe Pang, Weizhe Yuan, He He, Kyunghyun Cho, Sainbayar Sukhbaatar, and Jason Weston. Iterative reasoning preference optimization. *Advances in Neural Information Processing Systems*, 37:116617–116637, 2024.
- [34] Peiyi Wang, Lei Li, Zhihong Shao, RX Xu, Damai Dai, Yifei Li, Deli Chen, Yu Wu, and Zhifang Sui. Math-shepherd: Verify and reinforce llms step-by-step without human annotations. *arXiv preprint arXiv:2312.08935*, 2023.
- [35] Aaron Jaech, Adam Kalai, Adam Lerer, Adam Richardson, Ahmed El-Kishky, Aiden Low, Alec Helyar, Aleksander Madry, Alex Beutel, Alex Carney, et al. Openai o1 system card. *arXiv preprint arXiv:2412.16720*, 2024.
- [36] Niklas Muennighoff, Zitong Yang, Weijia Shi, Xiang Lisa Li, Li Fei-Fei, Hannaneh Hajishirzi, Luke Zettlemoyer, Percy Liang, Emmanuel Candès, and Tatsunori Hashimoto. s1: Simple test-time scaling, 2025. URL <https://arxiv.org/abs/2501.19393>.
- [37] Yixin Ye, Zhen Huang, Yang Xiao, Ethan Chern, Shijie Xia, and Pengfei Liu. Limo: Less is more for reasoning, 2025. URL <https://arxiv.org/abs/2502.03387>.
- [38] Huggingface. Open r1, 2025. URL <https://github.com/huggingface/open-r1>.
- [39] Yuxiang Zhang, Shangxi Wu, Yuqi Yang, Jiangming Shu, Jinlin Xiao, Chao Kong, and Jitao Sang. o1-coder: an o1 replication for coding, 2024. URL <https://arxiv.org/abs/2412.00154>.
- [40] Qiyang Yu, Zheng Zhang, Ruofei Zhu, Yufeng Yuan, Xiaochen Zuo, Yu Yue, Weinan Dai, Tiantian Fan, Gaohong Liu, Lingjun Liu, Xin Liu, Haibin Lin, Zhiqi Lin, Bole Ma, Guangming Sheng, Yuxuan Tong, Chi Zhang, Mofan Zhang, Wang Zhang, Hang Zhu, Jinhua Zhu, Jiase Chen, Jiangjie Chen, Chengyi Wang, Hongli Yu, Yuxuan Song, Xiangpeng Wei, Hao Zhou, Jingjing Liu, Wei-Ying Ma, Ya-Qin Zhang, Lin Yan, Mu Qiao, Yonghui Wu, and Mingxuan Wang. Dapo: An open-source llm reinforcement learning system at scale, 2025. URL <https://arxiv.org/abs/2503.14476>.
- [41] Wenhua Chen, Xueguang Ma, Xinyi Wang, and William W Cohen. Program of thoughts prompting: Disentangling computation from reasoning for numerical reasoning tasks. *arXiv preprint arXiv:2211.12588*, 2022.
- [42] Luyu Gao, Aman Madaan, Shuyan Zhou, Uri Alon, Pengfei Liu, Yiming Yang, Jamie Callan, and Graham Neubig. Pal: Program-aided language models. In *International Conference on Machine Learning*, pages 10764–10799. PMLR, 2023.
- [43] Ruida Wang, Jipeng Zhang, Yizhen Jia, Rui Pan, Shizhe Diao, Renjie Pi, and Tong Zhang. Theoremllama: Transforming general-purpose llms into lean4 experts. *arXiv preprint arXiv:2407.03203*, 2024.
- [44] Huajian Xin, Daya Guo, Zhihong Shao, Zhizhou Ren, Qihao Zhu, Bo Liu, Chong Ruan, Wenda Li, and Xiaodan Liang. Deepseek-prover: Advancing theorem proving in llms through large-scale synthetic data. *arXiv preprint arXiv:2405.14333*, 2024.
- [45] Kefan Dong and Tengyu Ma. Beyond limited data: Self-play llm theorem provers with iterative conjecturing and proving. *arXiv preprint arXiv:2502.00212*, 2025.
- [46] Zhibin Gou, Zhihong Shao, Yeyun Gong, Yelong Shen, Yujiu Yang, Nan Duan, and Weizhu Chen. Critic: Large language models can self-correct with tool-interactive critiquing. *arXiv preprint arXiv:2305.11738*, 2023.
- [47] Zuxin Liu, Thai Hoang, Jianguo Zhang, Ming Zhu, Tian Lan, Juntao Tan, Weiran Yao, Zhiwei Liu, Yihao Feng, Rithesh RN, et al. Apigen: Automated pipeline for generating verifiable and diverse function-calling datasets. *Advances in Neural Information Processing Systems*, 37: 54463–54482, 2024.
- [48] Changle Qu, Sunhao Dai, Xiaochi Wei, Hengyi Cai, Shuaiqiang Wang, Dawei Yin, Jun Xu, and Ji-Rong Wen. Tool learning with large language models: A survey. *Frontiers of Computer Science*, 19(8):198343, 2025.

- [49] Huatong Song, Jinhao Jiang, Yingqian Min, Jie Chen, Zhipeng Chen, Wayne Xin Zhao, Lei Fang, and Ji-Rong Wen. R1-searcher: Incentivizing the search capability in llms via reinforcement learning, 2025. URL <https://arxiv.org/abs/2503.05592>.
- [50] Xiaoxi Li, Guanting Dong, Jiajie Jin, Yuyao Zhang, Yujia Zhou, Yutao Zhu, Peitian Zhang, and Zhicheng Dou. Search-o1: Agentic search-enhanced large reasoning models, 2025. URL <https://arxiv.org/abs/2501.05366>.
- [51] Timo Schick, Jane Dwivedi-Yu, Roberto Dessì, Roberta Raileanu, Maria Lomeli, Luke Zettlemoyer, Nicola Cancedda, and Thomas Scialom. Toolformer: Language models can teach themselves to use tools, 2023. URL <https://arxiv.org/abs/2302.04761>.
- [52] Yusen Zhang, Ruoxi Sun, Yanfei Chen, Tomas Pfister, Rui Zhang, and Sercan Arik. Chain of agents: Large language models collaborating on long-context tasks. *Advances in Neural Information Processing Systems*, 37:132208–132237, 2024.
- [53] Yao Zhang, Hongxiao Zhang, Jiacheng Zhang, Jingcheng Zhao, Rui Yan, Xiaoqing Liu, Jiahuan Wang, Min Zhang, Houfeng Wang, and Zhengguang Guo. rStar-Math: Small LLMs can master math reasoning with self-evolved deep thinking. *arXiv preprint arXiv:2403.01707*, 2024.
- [54] Haozhe Wang, Long Li, Chao Qu, Fengming Zhu, Weidi Xu, Wei Chu, and Fangzhen Lin. Learning autonomous code integration for math language models, 2025. URL <https://arxiv.org/abs/2502.00691>.
- [55] Xinji Mai, Haotian Xu, Xing W, Weinong Wang, Yingying Zhang, and Wenqiang Zhang. Agent rl scaling law: Agent rl with spontaneous code execution for mathematical problem solving, 2025. URL <https://arxiv.org/abs/2505.07773>.
- [56] Kezhou Wang, Ruijie Wu, Qinlin Zeng, Huao Lu, Hanye Wu, Qingfeng Cui, Haichao Lin, Yujia Liu, Xiaoyan Huang, Qingpeng Guo, Songtao Jian, Kaiyuan Lu, Shiyu Li, Hao Tian, Yongqin Sun, Xue Yang, Libin Song, Zejun Ou, and Guoqing Wang. ToRL: Scaling tool-integrated RL for LLMs. *arXiv preprint arXiv:2312.10372*, 2023.
- [57] Hongru Wang, Cheng Qian, Wanjun Zhong, Xiusi Chen, Jiahao Qiu, Shijue Huang, Bowen Jin, Mengdi Wang, Kam-Fai Wong, and Heng Ji. Otc: Optimal tool calls via reinforcement learning. *arXiv preprint arXiv:2504.14870*, 2025.
- [58] Jiazhan Feng, Shijue Huang, Xingwei Qu, Ge Zhang, Yujia Qin, Baoquan Zhong, Chengquan Jiang, Jinxin Chi, and Wanjun Zhong. Retool: Reinforcement learning for strategic tool use in llms, 2025. URL <https://arxiv.org/abs/2504.11536>.
- [59] Hanze Dong, Wei Xiong, Deepanshu Goyal, Yihan Zhang, Winnie Chow, Rui Pan, Shizhe Diao, Jipeng Zhang, Kashun Shum, and Tong Zhang. RAFT: reward ranked finetuning for generative foundation model alignment. *Trans. Mach. Learn. Res.*, 2023.
- [60] Guangming Sheng, Chi Zhang, Zilingfeng Ye, Xibin Wu, Wang Zhang, Ru Zhang, Yanghua Peng, Haibin Lin, and Chuan Wu. Hybridflow: A flexible and efficient rlhf framework. *arXiv preprint arXiv: 2409.19256*, 2024.
- [61] Jia LI, Edward Beeching, Lewis Tunstall, Ben Lipkin, Roman Soletskyi, Shengyi Costa Huang, Kashif Rasul, Longhui Yu, Albert Jiang, Ziju Shen, Zihan Qin, Bin Dong, Li Zhou, Yann Fleureau, Guillaume Lample, and Stanislas Polu. Numinamath. [<https://huggingface.co/AI-MO/NuminaMath-1.5>] ([https://github.com/project-numina/aimo-progress-prize/blob/main/report/numina\\_dataset.pdf](https://github.com/project-numina/aimo-progress-prize/blob/main/report/numina_dataset.pdf)), 2024.
- [62] Hynek Kydlíček. Math-verify: Math verification library, 2024. URL <https://github.com/huggingface/math-verify>.
- [63] Michael Luo, Sijun Tan, Justin Wong, Xiaoxiang Shi, William Y. Tang, Manan Roongta, Colin Cai, Jeffrey Luo, Li Erran Li, Raluca Ada Popa, and Ion Stoica. Deepscaler: Surpassing o1-preview with a 1.5b model by scaling rl. <https://pretty-radio-b75.notion.site/DeepScaleR-Surpassing-O1-Preview-with-a-1-5B-Model-by-Scaling-RL-19681902c1468005bed8ca3030>, 2025. Notion Blog.

- 479 [64] Chaoqun He, Renjie Luo, Yuzhuo Bai, Shengding Hu, Zhen Leng Thai, Junhao Shen, Jinyi  
480 Hu, Xu Han, Yujie Huang, Yuxiang Zhang, Jie Liu, Lei Qi, Zhiyuan Liu, and Maosong Sun.  
481 Olympiadbench: A challenging benchmark for promoting agi with olympiad-level bilingual  
482 multimodal scientific problems, 2024.
- 483 [65] Dan Hendrycks, Collin Burns, Saurav Kadavath, Akul Arora, Steven Basart, Eric Tang, Dawn  
484 Song, and Jacob Steinhardt. Measuring mathematical problem solving with the MATH dataset.  
485 In *NeurIPS Datasets and Benchmarks*, 2021.
- 486 [66] Jia LI, Edward Beeching, Lewis Tunstall, Ben Lipkin, Roman Soletskyi, Shengyi Costa  
487 Huang, Kashif Rasul, Longhui Yu, Albert Jiang, Ziju Shen, Zihan Qin, Bin Dong,  
488 Li Zhou, Yann Fleureau, Guillaume Lample, and Stanislas Polu. Numinamath. [[https:  
489 //github.com/project-numina/aimo-progress-prize](https://github.com/project-numina/aimo-progress-prize)] ([https://github.com/  
490 project-numina/aimo-progress-prize/blob/main/report/numina\\_dataset.pdf](https://github.com/project-numina/aimo-progress-prize/blob/main/report/numina_dataset.pdf)),  
491 2024.
- 492 [67] Qwen Team. Qwq-32b: Embracing the power of reinforcement learning, March 2025. URL  
493 <https://qwenlm.github.io/blog/qwq-32b/>.



## NeurIPS Paper Checklist

### 1. Claims

Question: Do the main claims made in the abstract and introduction accurately reflect the paper's contributions and scope?

Answer: [\[Yes\]](#)

Justification: Our contributions are clearly articulated in the Abstract, while the concluding paragraphs of the Introduction provide detailed scope and enumerate specific technical innovations that accurately represent the paper's content and limitations.

Guidelines:

- The answer NA means that the abstract and introduction do not include the claims made in the paper.
- The abstract and/or introduction should clearly state the claims made, including the contributions made in the paper and important assumptions and limitations. A No or NA answer to this question will not be perceived well by the reviewers.
- The claims made should match theoretical and experimental results, and reflect how much the results can be expected to generalize to other settings.
- It is fine to include aspirational goals as motivation as long as it is clear that these goals are not attained by the paper.

### 2. Limitations

Question: Does the paper discuss the limitations of the work performed by the authors?

Answer: [\[Yes\]](#)

Justification: We discuss the limitations in Appendix J.

Guidelines:

- The answer NA means that the paper has no limitation while the answer No means that the paper has limitations, but those are not discussed in the paper.
- The authors are encouraged to create a separate "Limitations" section in their paper.
- The paper should point out any strong assumptions and how robust the results are to violations of these assumptions (e.g., independence assumptions, noiseless settings, model well-specification, asymptotic approximations only holding locally). The authors should reflect on how these assumptions might be violated in practice and what the implications would be.
- The authors should reflect on the scope of the claims made, e.g., if the approach was only tested on a few datasets or with a few runs. In general, empirical results often depend on implicit assumptions, which should be articulated.
- The authors should reflect on the factors that influence the performance of the approach. For example, a facial recognition algorithm may perform poorly when image resolution is low or images are taken in low lighting. Or a speech-to-text system might not be used reliably to provide closed captions for online lectures because it fails to handle technical jargon.
- The authors should discuss the computational efficiency of the proposed algorithms and how they scale with dataset size.
- If applicable, the authors should discuss possible limitations of their approach to address problems of privacy and fairness.
- While the authors might fear that complete honesty about limitations might be used by reviewers as grounds for rejection, a worse outcome might be that reviewers discover limitations that aren't acknowledged in the paper. The authors should use their best judgment and recognize that individual actions in favor of transparency play an important role in developing norms that preserve the integrity of the community. Reviewers will be specifically instructed to not penalize honesty concerning limitations.

### 3. Theory assumptions and proofs

Question: For each theoretical result, does the paper provide the full set of assumptions and a complete (and correct) proof?

Answer: [NA]

Justification: Our work is an empirical exploration.

Guidelines:

- The answer NA means that the paper does not include theoretical results.
- All the theorems, formulas, and proofs in the paper should be numbered and cross-referenced.
- All assumptions should be clearly stated or referenced in the statement of any theorems.
- The proofs can either appear in the main paper or the supplemental material, but if they appear in the supplemental material, the authors are encouraged to provide a short proof sketch to provide intuition.
- Inversely, any informal proof provided in the core of the paper should be complemented by formal proofs provided in appendix or supplemental material.
- Theorems and Lemmas that the proof relies upon should be properly referenced.

#### 4. Experimental result reproducibility

Question: Does the paper fully disclose all the information needed to reproduce the main experimental results of the paper to the extent that it affects the main claims and/or conclusions of the paper (regardless of whether the code and data are provided or not)?

Answer: [Yes]

Justification: We provide all of the evaluation and training hyperparameters in the Appendix and we plan to release the full code and model.

Guidelines:

- The answer NA means that the paper does not include experiments.
- If the paper includes experiments, a No answer to this question will not be perceived well by the reviewers: Making the paper reproducible is important, regardless of whether the code and data are provided or not.
- If the contribution is a dataset and/or model, the authors should describe the steps taken to make their results reproducible or verifiable.
- Depending on the contribution, reproducibility can be accomplished in various ways. For example, if the contribution is a novel architecture, describing the architecture fully might suffice, or if the contribution is a specific model and empirical evaluation, it may be necessary to either make it possible for others to replicate the model with the same dataset, or provide access to the model. In general, releasing code and data is often one good way to accomplish this, but reproducibility can also be provided via detailed instructions for how to replicate the results, access to a hosted model (e.g., in the case of a large language model), releasing of a model checkpoint, or other means that are appropriate to the research performed.
- While NeurIPS does not require releasing code, the conference does require all submissions to provide some reasonable avenue for reproducibility, which may depend on the nature of the contribution. For example
  - (a) If the contribution is primarily a new algorithm, the paper should make it clear how to reproduce that algorithm.
  - (b) If the contribution is primarily a new model architecture, the paper should describe the architecture clearly and fully.
  - (c) If the contribution is a new model (e.g., a large language model), then there should either be a way to access this model for reproducing the results or a way to reproduce the model (e.g., with an open-source dataset or instructions for how to construct the dataset).
  - (d) We recognize that reproducibility may be tricky in some cases, in which case authors are welcome to describe the particular way they provide for reproducibility. In the case of closed-source models, it may be that access to the model is limited in some way (e.g., to registered users), but it should be possible for other researchers to have some path to reproducing or verifying the results.

#### 5. Open access to data and code

Question: Does the paper provide open access to the data and code, with sufficient instructions to faithfully reproduce the main experimental results, as described in supplemental material?

Answer: [Yes]

Justification: We will submit our code in Supplemental Material and will open-source code and models on GitHub in the final version.

Guidelines:

- The answer NA means that paper does not include experiments requiring code.
- Please see the NeurIPS code and data submission guidelines (<https://nips.cc/public/guides/CodeSubmissionPolicy>) for more details.
- While we encourage the release of code and data, we understand that this might not be possible, so “No” is an acceptable answer. Papers cannot be rejected simply for not including code, unless this is central to the contribution (e.g., for a new open-source benchmark).
- The instructions should contain the exact command and environment needed to run to reproduce the results. See the NeurIPS code and data submission guidelines (<https://nips.cc/public/guides/CodeSubmissionPolicy>) for more details.
- The authors should provide instructions on data access and preparation, including how to access the raw data, preprocessed data, intermediate data, and generated data, etc.
- The authors should provide scripts to reproduce all experimental results for the new proposed method and baselines. If only a subset of experiments are reproducible, they should state which ones are omitted from the script and why.
- At submission time, to preserve anonymity, the authors should release anonymized versions (if applicable).
- Providing as much information as possible in supplemental material (appended to the paper) is recommended, but including URLs to data and code is permitted.

## 6. Experimental setting/details

Question: Does the paper specify all the training and test details (e.g., data splits, hyper-parameters, how they were chosen, type of optimizer, etc.) necessary to understand the results?

Answer: [Yes]

Justification: We will specify all details regarding training and test in the Appendix.

Guidelines:

- The answer NA means that the paper does not include experiments.
- The experimental setting should be presented in the core of the paper to a level of detail that is necessary to appreciate the results and make sense of them.
- The full details can be provided either with the code, in appendix, or as supplemental material.

## 7. Experiment statistical significance

Question: Does the paper report error bars suitably and correctly defined or other appropriate information about the statistical significance of the experiments?

Answer: [No]

Justification: Due to the substantial computational resources required for large language model (LLM) inference, it was impractical to conduct multiple experimental runs to obtain reliable error bars.

Guidelines:

- The answer NA means that the paper does not include experiments.
- The authors should answer "Yes" if the results are accompanied by error bars, confidence intervals, or statistical significance tests, at least for the experiments that support the main claims of the paper.

- The factors of variability that the error bars are capturing should be clearly stated (for example, train/test split, initialization, random drawing of some parameter, or overall run with given experimental conditions).
- The method for calculating the error bars should be explained (closed form formula, call to a library function, bootstrap, etc.)
- The assumptions made should be given (e.g., Normally distributed errors).
- It should be clear whether the error bar is the standard deviation or the standard error of the mean.
- It is OK to report 1-sigma error bars, but one should state it. The authors should preferably report a 2-sigma error bar than state that they have a 96% CI, if the hypothesis of Normality of errors is not verified.
- For asymmetric distributions, the authors should be careful not to show in tables or figures symmetric error bars that would yield results that are out of range (e.g. negative error rates).
- If error bars are reported in tables or plots, The authors should explain in the text how they were calculated and reference the corresponding figures or tables in the text.

## 8. Experiments compute resources

Question: For each experiment, does the paper provide sufficient information on the computer resources (type of compute workers, memory, time of execution) needed to reproduce the experiments?

Answer: [Yes]

Justification: We will claim our computing resources in the Appendix.

Guidelines:

- The answer NA means that the paper does not include experiments.
- The paper should indicate the type of compute workers CPU or GPU, internal cluster, or cloud provider, including relevant memory and storage.
- The paper should provide the amount of compute required for each of the individual experimental runs as well as estimate the total compute.
- The paper should disclose whether the full research project required more compute than the experiments reported in the paper (e.g., preliminary or failed experiments that didn't make it into the paper).

## 9. Code of ethics

Question: Does the research conducted in the paper conform, in every respect, with the NeurIPS Code of Ethics <https://neurips.cc/public/EthicsGuidelines>?

Answer: [Yes]

Justification: We have read this code.

Guidelines:

- The answer NA means that the authors have not reviewed the NeurIPS Code of Ethics.
- If the authors answer No, they should explain the special circumstances that require a deviation from the Code of Ethics.
- The authors should make sure to preserve anonymity (e.g., if there is a special consideration due to laws or regulations in their jurisdiction).

## 10. Broader impacts

Question: Does the paper discuss both potential positive societal impacts and negative societal impacts of the work performed?

Answer: [Yes]

Justification: We discuss the limitations in Appendix I.

Guidelines:

- The answer NA means that there is no societal impact of the work performed.
- If the authors answer NA or No, they should explain why their work has no societal impact or why the paper does not address societal impact.

- Examples of negative societal impacts include potential malicious or unintended uses (e.g., disinformation, generating fake profiles, surveillance), fairness considerations (e.g., deployment of technologies that could make decisions that unfairly impact specific groups), privacy considerations, and security considerations.
- The conference expects that many papers will be foundational research and not tied to particular applications, let alone deployments. However, if there is a direct path to any negative applications, the authors should point it out. For example, it is legitimate to point out that an improvement in the quality of generative models could be used to generate deepfakes for disinformation. On the other hand, it is not needed to point out that a generic algorithm for optimizing neural networks could enable people to train models that generate Deepfakes faster.
- The authors should consider possible harms that could arise when the technology is being used as intended and functioning correctly, harms that could arise when the technology is being used as intended but gives incorrect results, and harms following from (intentional or unintentional) misuse of the technology.
- If there are negative societal impacts, the authors could also discuss possible mitigation strategies (e.g., gated release of models, providing defenses in addition to attacks, mechanisms for monitoring misuse, mechanisms to monitor how a system learns from feedback over time, improving the efficiency and accessibility of ML).

## 11. Safeguards

Question: Does the paper describe safeguards that have been put in place for responsible release of data or models that have a high risk for misuse (e.g., pretrained language models, image generators, or scraped datasets)?

Answer: [No]

Justification: Our study is an empirical exploration using open-source mathematical problem sets. The models we release are intended only for academic research purposes and not designed for industrial applications, posing minimal risk for misuse.

Guidelines:

- The answer NA means that the paper poses no such risks.
- Released models that have a high risk for misuse or dual-use should be released with necessary safeguards to allow for controlled use of the model, for example by requiring that users adhere to usage guidelines or restrictions to access the model or implementing safety filters.
- Datasets that have been scraped from the Internet could pose safety risks. The authors should describe how they avoided releasing unsafe images.
- We recognize that providing effective safeguards is challenging, and many papers do not require this, but we encourage authors to take this into account and make a best faith effort.

## 12. Licenses for existing assets

Question: Are the creators or original owners of assets (e.g., code, data, models), used in the paper, properly credited and are the license and terms of use explicitly mentioned and properly respected?

Answer: [Yes]

Justification: We have rigorously credited all creators and original owners of assets used in our research.

Guidelines:

- The answer NA means that the paper does not use existing assets.
- The authors should cite the original paper that produced the code package or dataset.
- The authors should state which version of the asset is used and, if possible, include a URL.
- The name of the license (e.g., CC-BY 4.0) should be included for each asset.
- For scraped data from a particular source (e.g., website), the copyright and terms of service of that source should be provided.

- If assets are released, the license, copyright information, and terms of use in the package should be provided. For popular datasets, [paperswithcode.com/datasets](https://paperswithcode.com/datasets) has curated licenses for some datasets. Their licensing guide can help determine the license of a dataset.
- For existing datasets that are re-packaged, both the original license and the license of the derived asset (if it has changed) should be provided.
- If this information is not available online, the authors are encouraged to reach out to the asset's creators.

### 13. New assets

Question: Are new assets introduced in the paper well documented and is the documentation provided alongside the assets?

Answer: [Yes]

Justification: All datasets, code, and models developed in our research will be comprehensively released under the CC-BY 4.0 license.

Guidelines:

- The answer NA means that the paper does not release new assets.
- Researchers should communicate the details of the dataset/code/model as part of their submissions via structured templates. This includes details about training, license, limitations, etc.
- The paper should discuss whether and how consent was obtained from people whose asset is used.
- At submission time, remember to anonymize your assets (if applicable). You can either create an anonymized URL or include an anonymized zip file.

### 14. Crowdsourcing and research with human subjects

Question: For crowdsourcing experiments and research with human subjects, does the paper include the full text of instructions given to participants and screenshots, if applicable, as well as details about compensation (if any)?

Answer: [Yes]

Justification: We will provide detailed instructions in the Appendix.

Guidelines:

- The answer NA means that the paper does not involve crowdsourcing nor research with human subjects.
- Including this information in the supplemental material is fine, but if the main contribution of the paper involves human subjects, then as much detail as possible should be included in the main paper.
- According to the NeurIPS Code of Ethics, workers involved in data collection, curation, or other labor should be paid at least the minimum wage in the country of the data collector.

### 15. Institutional review board (IRB) approvals or equivalent for research with human subjects

Question: Does the paper describe potential risks incurred by study participants, whether such risks were disclosed to the subjects, and whether Institutional Review Board (IRB) approvals (or an equivalent approval/review based on the requirements of your country or institution) were obtained?

Answer: [Yes]

Justification: The annotators involved in our research were fully informed about all details of the annotation task and its purpose. We obtained proper institutional approval before beginning the annotation process

Guidelines:

- The answer NA means that the paper does not involve crowdsourcing nor research with human subjects.



- 804 • Depending on the country in which research is conducted, IRB approval (or equivalent)  
805 may be required for any human subjects research. If you obtained IRB approval, you  
806 should clearly state this in the paper.
- 807 • We recognize that the procedures for this may vary significantly between institutions  
808 and locations, and we expect authors to adhere to the NeurIPS Code of Ethics and the  
809 guidelines for their institution.
- 810 • For initial submissions, do not include any information that would break anonymity (if  
811 applicable), such as the institution conducting the review.

## 812 16. Declaration of LLM usage

813 Question: Does the paper describe the usage of LLMs if it is an important, original, or  
814 non-standard component of the core methods in this research? Note that if the LLM is used  
815 only for writing, editing, or formatting purposes and does not impact the core methodology,  
816 scientific rigorousness, or originality of the research, declaration is not required.

817 Answer: [NA]

818 Justification: We use LLMs solely for grammatical checks in this work.

819 Guidelines:

- 820 • The answer NA means that the core method development in this research does not  
821 involve LLMs as any important, original, or non-standard components.
- 822 • Please refer to our LLM policy (<https://neurips.cc/Conferences/2025/LLM>)  
823 for what should or should not be described.

## A Related Work

### A.1 Reasoning in LLMs

The evolution of reasoning capabilities in LLMs has progressed rapidly in recent years [20–22, 3, 5, 7, 12]. For comprehensive coverage of this field, we direct readers to recent surveys [23–25]. A pivotal technique in this field is Chain-of-Thought reasoning [8], which, when combined with Transformer architectures [26], enables models to perform complex computational tasks [27]. This field has benefited substantially from scaling up synthetic data [28–30] and has evolved toward training directly from RL using pre-trained models [7, 31, 32]. These advances leverage various approaches, including preference optimization [33], Monte Carlo Tree Search [34], and advanced RL techniques [1–3]. Notably, following OpenAI’s o1 [35], there has been a significant trend towards long-form Chain-of-Thought reasoning, incorporating human-like cognitive patterns such as multiple reflections, task decomposition, and strategic exploration and these LLMs are often called large reasoning models(LRMs). This integration of human-inspired reasoning approaches has led to substantial improvements in complex reasoning tasks, particularly in coding and mathematics, where models have demonstrated unprecedented capabilities in systematic problem-solving [36–40]. While natural language remains the primary medium for reasoning in this domain, there is growing interest in integrating external tools such as code interpreters [41, 42, 10] and automatic verification systems [43–45] to overcome the inherent limitations of natural language reasoning, such as accurate computation.

### A.2 Code-Integrated Reasoning for LLMs

Recent research has explored integrating external tools with language models to enhance their reasoning capabilities [46–51]. ToRA [10] pioneered code-integrated reasoning specifically for mathematical problem-solving, demonstrating that offloading complex calculations to specialized systems significantly improves performance. Since then, COA [52] trains LLMs to decode reasoning chains with abstract placeholders, and then call domain tools to reify each reasoning chain by filling in specific knowledge. rStar-Math [53] introduced a code-augmented Chain of Thought data synthesis method through Monte Carlo Tree Search. Recent works [54–57] have initiated investigations into frameworks that enable base models to autonomously develop code-integrated reasoning capabilities for mathematical problem-solving. With the advancement of Large Reasoning Models (LRMs), the organic integration of code interpreters within long-form Chain-of-Thought reasoning has emerged as a crucial research challenge. Several concurrent works have explored this direction. START [19], which shares similarities with our approach, introduces hints to guide code generation within large reasoning modes; however, their random hint insertion may lead to suboptimal utilization of code interpreters. STILL3 [15] employs prompting techniques to construct code-integrated data, similar to our proposed Prompt-Hint method, but does not address reasoning efficiency. Retool [58] attempts to bootstrap training data by rewriting long Chain-of-Thought reasoning, yet shows limited performance improvements when based on DeepSeek-R1-Distill-Qwen-32B. While OTC [57] considers efficiency from the perspective of tool call frequency, it does not explore methods for enhancement building upon existing LRMs. CoRT proposed a highly sample-efficient approach that achieved both performance breakthroughs and significant improvements in reasoning efficiency. Through human-in-the-loop annotation of 30 high-quality samples, combined with techniques such as RFT [14, 59] and RL, they demonstrated that substantial improvements in both reasoning capabilities and efficiency can be achieved with minimal high-quality training data.

## B Experiment Implementation

### B.1 Training Implementation

For our experiments, we implemented several model variants with different training stages and architectures:

#### 32B Models:

- **Prompt-Hint-SFT-32B:** Starting from the DeepSeek-R1-32B base model, we fine-tuned using 800 data samples with a learning rate of  $1 \times 10^{-5}$ , running for 17 epochs with a batch size of 96.

- **Hint-Engineering-SFT-32B:** Based on DeepSeek-R1-32B, we fine-tuned using only 30 high-quality, human-annotated data samples with a batch size of 96, learning rate of  $1 \times 10^{-5}$ , and 40 epochs.
- **Hint-Engineering-RFT-32B:** Building upon Hint-Engineering-SFT-32B, we further fine-tuned using 800 filtered data samples with a learning rate of  $1 \times 10^{-5}$ , 17 epochs, and batch size of 96.

## 1.5B Models:

- We distilled both Prompt-Hint-SFT-32B and Hint-Engineering-RFT-32B down to the DeepSeek-R1-1.5B architecture using 10k data samples with a learning rate of  $7 \times 10^{-6}$ , 6 epochs, and batch size of 128.
- For reinforcement learning, we adapted the veRL framework [60] to implement our specialized design outlined in Section 2.4. We further trained these 1.5B models with a learning rate of  $1 \times 10^{-6}$ , maximum response length of 16,000 tokens, 8 rollouts per problem, and maximum function calls limited to 15 per response, with each function call having a maximum length of 16,000 tokens.
- The RL training data was carefully selected by computing the average accuracy over 8 samples (avg@8) on 20k randomly selected problems from the NuminaMath-1.5 [61] dataset, then selecting only 1k challenging problems where avg@8 = 1/8 for focused training. This selective approach is motivated by our data ablation studies (Appendix D.2), which demonstrate that training on hard queries, while requiring longer convergence time, ultimately yields superior performance compared to easy or uniformly distributed queries.

## B.2 Evaluation Methodology

To ensure comprehensive and fair comparisons across different approaches, we implemented the following evaluation protocol:

- **Fair Comparison:** For publicly available models, we re-evaluated them on our local infrastructure using their original evaluation scripts to ensure consistent comparison conditions across all models.
- **Evaluation Protocol:** For all datasets, we extract the final answer from each model response and compare it directly to the ground truth using Math-Verify [62], considering a problem correctly solved only when Math-Verify returns True.
- **Evaluation Metrics:** We primarily used pass@1 as our base metric. Concretely, we employed avg@16 (average accuracy over 16 samples) as pass@1 for AIME24, AIME25, and AMC23 datasets. For MATH500 and OlympiadBench datasets, we used avg@4 as pass@1 due to their significantly larger test sizes.
- **Inference Setting:** Across all evaluations, we standardized inference parameters with maximum sequence length of 32,768 tokens, maximum function calls limited to 15, maximum tokens per function call set to 32,768, temperature of 0.6, and top- $p$  sampling parameter of 0.95.

## B.3 Function Call Limiting Strategy

During both evaluation and reinforcement learning rollout sampling with Python usage, we implemented a mechanism to handle scenarios where models reached the maximum allowed function calls. When this limit was reached, we appended the following system message to guide further reasoning:

[SYSTEM]  
You have exceeded the allowed number of code executions. You can no longer write or run code. Please continue solving the problem using your reasoning and analytical skills.

This approach ensures that models can still complete their reasoning process without unlimited computational resources, better reflecting real-world usage constraints.

## B.4 Computational Hardware

Our experiments utilized the following hardware:

- **Training:** All training procedures, including supervised fine-tuning (SFT), rejection fine-tuning (RFT), and reinforcement learning (RL), were conducted on 4 servers, each equipped with 8 NVIDIA A100 GPUs.
- **Evaluation:** All model evaluations were performed on single servers, each equipped with 8 NVIDIA A100 GPUs, ensuring consistent measurement conditions across all compared approaches.

## C Evaluation Dataset Description

To comprehensively assess the mathematical reasoning capabilities of our models, we utilize several challenging benchmarks that span diverse difficulty levels and mathematical domains:

**AIME24 and AIME25.** The American Invitational Mathematics Examination (AIME) represents a significant advancement beyond standard high school mathematics competitions, featuring problems that demand sophisticated reasoning techniques. We employ AIME24 and AIME25 as our primary benchmarks for evaluating advanced mathematical reasoning capabilities in our models.

**AMC23.** Following DeepScaleR [63], we utilize their American Mathematics Competition (AMC) test set, which presents problems of moderate yet substantial difficulty, requiring considerable mathematical insight to solve. This dataset enables us to evaluate our models’ proficiency in addressing a wider spectrum of mathematical challenges typically encountered in standard high school competitions.

**MATH500.** Curated from the test split of OpenAI’s PRM800K dataset [22], MATH500 encompasses 500 carefully selected problems that represent a diverse range of mathematical challenges. We utilize this dataset to evaluate our models’ ability to generalize across varied mathematical topics and problem structures.

**OlympiadBench.** Following DeepScaleR [63], we incorporate their OlympiadBench [64] into our evaluation framework. This benchmark comprises 675 Olympiad-level problems sourced from elite mathematics competitions, providing an exceptionally rigorous test of advanced mathematical reasoning.

## D Extra Experiments

### D.1 Code Behavior Evolution During RL

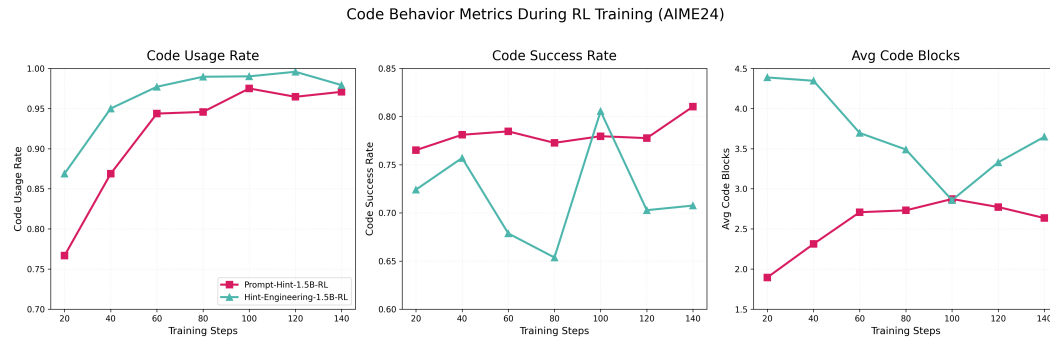

Figure 8: Evolution of code behavior metrics during RL training on AIME24.

Figure 8 tracks six key metrics of code behavior throughout the RL training process:

- **Code Usage Rate:** The percentage of responses containing Python code out of all responses. Both approaches show increasing code usage rates during training, with Hint-Engineering consistently maintaining higher rates, starting at 86% and quickly rising above 95%.
- **Code Success Rate:** The percentage of code blocks that execute without errors. The success rate shows different patterns between the two approaches. Prompt-Hint maintains relatively stable success rates around 78%, while Hint-Engineering shows more variability but achieves higher peaks.
- **Average Code Blocks:** The average number of Python code blocks per response. Interestingly, Hint-Engineering shows a steady decrease in the average number of code blocks from 4.4 to around 3.5 at peak performance, while Prompt-Hint increases from 1.9 to around 2.7. This divergence reveals a fundamental difference in evolution: Hint-Engineering evolves toward more efficient code usage (fewer but more effective blocks), while Prompt-Hint develops more code integration capabilities from its lower starting point.

These patterns reveal that reinforcement learning not only improves raw performance but actively shapes code usage behavior, with Hint-Engineering evolving toward an efficiency-optimized pattern (less code but more effective) while Prompt-Hint evolves toward increased code integration (more code with improving effectiveness).

## D.2 RL Training Data Ablation

To understand the impact of training data characteristics on RL performance, we conduct three ablation studies examining data volume, query difficulty distribution, and topic distribution effects.

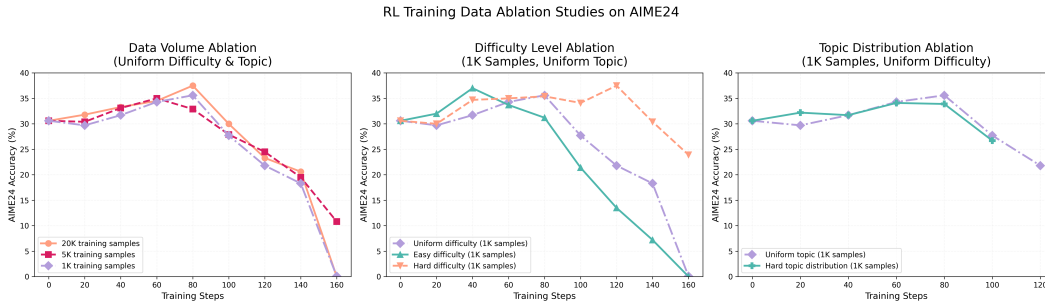

Figure 9: RL training data ablation studies on AIME24. **Left:** Data scaling ablation with 1K, 5K, and 20K training samples under uniform difficulty and topic distributions. **Middle:** Query difficulty ablation comparing easy (avg@8=7/8), uniform, and hard (avg@8=1/8) difficulty distributions with 1K samples. **Right:** Topic distribution ablation comparing uniform and hard topic distributions with 1K samples under uniform difficulty.

**Data Scaling Ablation** (Figure 9, left): We investigate whether increasing training data volume directly improves optimal performance by comparing 1K, 5K, and 20K training samples while maintaining uniform difficulty and topic distributions. Surprisingly, we find that simply scaling up RL training data does not lead to better optimal performance. This finding suggests that the "less is more" principle still holds in large reasoning model (LRM) training, and data quality may be more important than quantity for RL fine-tuning.

**Query Difficulty Ablation** (Figure 9, middle): We examine how query difficulty distribution affects learning dynamics by comparing three settings with 1K samples: easy queries (avg@8=7/8), uniform difficulty distribution, and hard queries (avg@8=1/8). Our results reveal distinct learning patterns: easy queries achieve optimal performance earliest but with lower peak accuracy, uniform distribution shows intermediate behavior, while hard queries take longer to reach optimal performance but ultimately achieve the best results. This suggests that training on challenging examples, though slower to converge, leads to superior final performance in mathematical reasoning tasks.

**Topic Distribution Ablation** (Figure 9, right): We investigate whether aligning training topic distribution with hard query topics improves performance by comparing uniform topic distribution

989 against a distribution matching hard queries ( $\text{avg@8}=1/8$ ). The results show minimal differences  
 990 between the two distributions, indicating that topic distribution changes do not significantly impact  
 991 optimal performance. This suggests that the model’s reasoning capabilities generalize well across  
 992 different mathematical topics, and the difficulty level is more crucial than specific topic coverage.

### 993 D.3 Code Reward Ablation

994 To investigate the effectiveness of our code reward mechanism and determine the optimal penalty  
 995 strength, we conduct ablation studies comparing different penalty values in the code reward function.

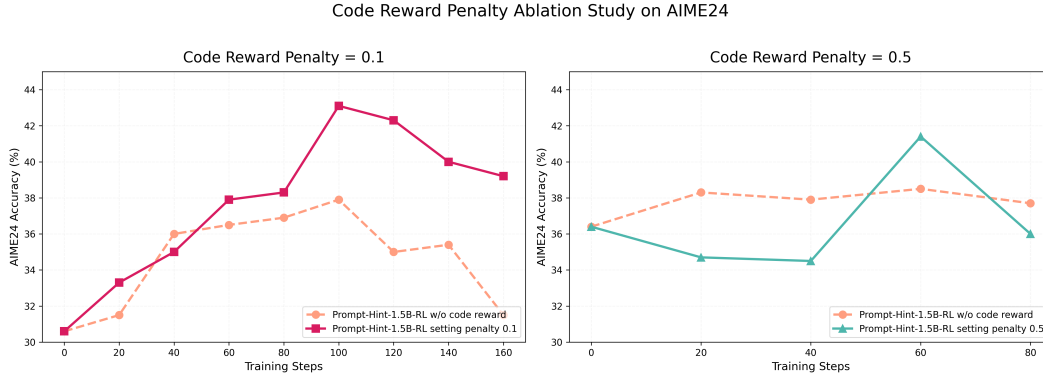

Figure 10: Code reward penalty ablation study on AIME24. **Left:** Comparison between training with and without code reward using penalty=0.1. **Right:** Comparison between training with and without code reward using penalty=0.5 on a different SFT model.

996 **Code Reward Effectiveness:** Our results demonstrate that incorporating code reward significantly  
 997 improves model performance compared to training without it. In the penalty=0.1 setting (Figure 10,  
 998 left), the model with code reward achieves a peak accuracy of 43.1% at step 100, substantially  
 999 outperforming the baseline without code reward (37.9% peak). This improvement persists throughout  
 1000 most of the training process, indicating that the code reward provides consistent learning signals that  
 1001 guide the model toward better reasoning strategies.

1002 **Penalty Strength Analysis:** Comparing different penalty values reveals that penalty=0.1 yields  
 1003 superior and more stable performance than penalty=0.5. The penalty=0.1 configuration shows  
 1004 smoother convergence and maintains higher accuracy levels across training steps. In contrast,  
 1005 penalty=0.5 (Figure 10, right) exhibits more erratic behavior, with a notable spike at step 60 (41.4%)  
 1006 followed by a sharp decline. This suggests that excessive penalty strength may introduce instability  
 1007 in the training process, potentially causing the model to over-correct its behavior when generating  
 1008 incorrect code.

### 1009 D.4 Token Efficiency Analysis for Lightweight Models

1010 We conduct a detailed analysis of token efficiency in 1.5B parameter lightweight models, examining  
 1011 how different approaches impact computational resource utilization while maintaining mathematical  
 1012 reasoning capabilities.

1013 Our token efficiency analysis reveals two key insights about the computational efficiency of  
 1014 lightweight mathematical reasoning models:

1015 **Superior Performance with Limited Token Budgets:** As shown in Figure 11 (left), Hint-  
 1016 Engineering-SFT consistently outperforms both the base model (DeepSeek-R1-1.5B) and Prompt-  
 1017 Hint-SFT across all token budget constraints. Most notably, with just a 4k token budget, Hint-  
 1018 Engineering-SFT achieves 22.7% accuracy, nearly double the performance of DeepSeek-R1-1.5B  
 1019 (12.1%) and Prompt-Hint-SFT (11.0%). This indicates that Hint-Engineering’s structured approach  
 1020 to problem-solving enables more efficient reasoning within constrained computational environments.



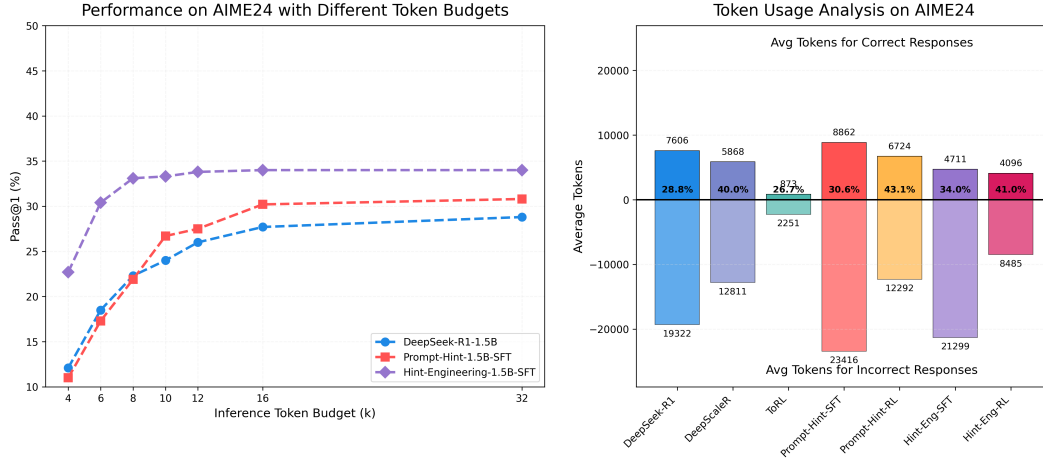

Figure 11: Token efficiency analysis for 1.5B parameter models on AIME24. **Left:** Performance comparison across different token budgets. **Right:** Detailed token usage breakdown for each model, showing average token consumption for both correct (above axis) and incorrect (below axis) responses, with Pass@1 accuracy displayed at the center.

**Substantial Token Savings Across All Response Types:** Figure 11 (right) demonstrates that Hint-Engineering models maintain significantly lower token usage compared to alternatives. For correct responses, Hint-Engineering-SFT uses 47% fewer tokens than Prompt-Hint-SFT (4,711 vs. 8,862), while for incorrect responses, the savings are even more dramatic, with Hint-Engineering-RL consuming 31% fewer tokens than Prompt-Hint-RL (8,485 vs. 12,292). Overall, Hint-Engineering-RL achieves a 32% reduction in total token consumption compared to Prompt-Hint-RL (6,684 vs. 9,891) while maintaining comparable accuracy (41.0% vs. 43.1%). Furthermore, Hint-Engineering models use about 50% fewer tokens for the 1.5B model compared with the natural language models.

## D.5 Pass@K Analysis for Frontier Models

To understand how our approaches scale with sampling budget and model size, we conduct a comprehensive Pass@k analysis on 32B parameter frontier models.

Figure 12 illustrates the performance of our 32B parameter models as a function of sample size ( $k$ ) on both AIME24 and MATH500-Level5 datasets. Our analysis reveals two key patterns in the scaling behavior of these models.

**SFT Provides Modest Gains at Lower Sampling Budgets:** Both Prompt-Hint-32B-SFT and Hint-Engineering-32B-SFT show improvements over the baseline DeepSeek-R1-32B, particularly at lower  $k$  values. At  $k=1$  on AIME24, Prompt-Hint-32B-SFT achieves 77.3% accuracy compared to the baseline’s 72.9%. However, all models eventually converge to similar maximum performance levels (93.3% for AIME24 and 99.2% for MATH500-Level5) as  $k$  increases, suggesting that SFT primarily enhances the model’s efficiency rather than raising its reasoning ceiling.

**RFT Significantly Enhances Sample Efficiency:** Hint-Engineering-32B-RFT demonstrates remarkable efficiency, reaching 93.3% accuracy with just  $k=8$  samples on AIME24, while other approaches require 2-4 times more samples to achieve comparable results. This indicates that reinforcement fine-tuning successfully optimizes the model’s ability to consistently arrive at correct solutions with fewer attempts, making it particularly valuable in scenarios where computational efficiency is critical.

# Pass@k Performance Analysis - 32B Models

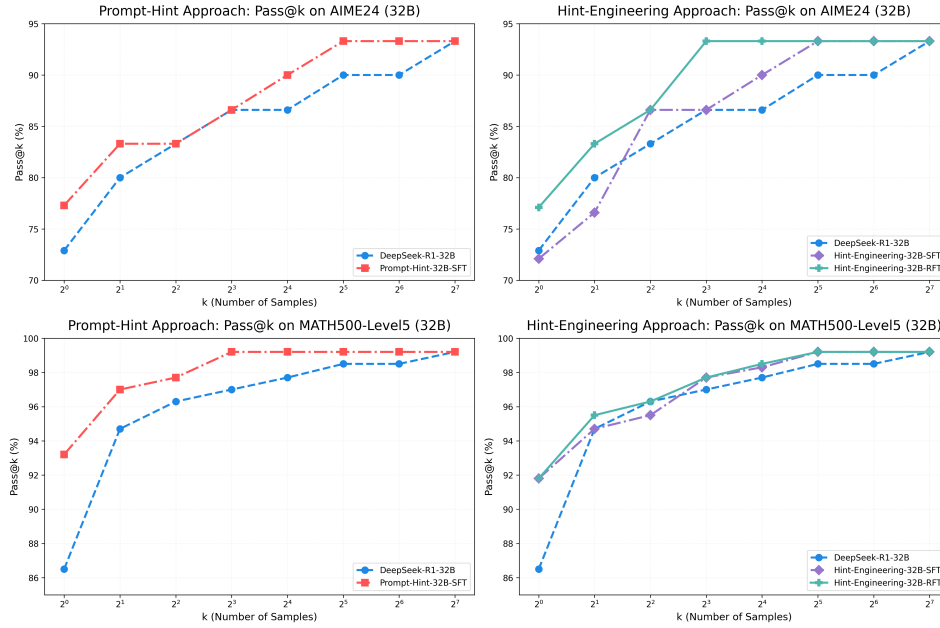

Figure 12: Pass@k analysis for 32B parameter models. **Top row:** Performance on AIME24 comparing Prompt-Hint (left) and Hint-Engineering (right) approaches against the DeepSeek-R1-32B baseline. **Bottom row:** Performance on MATH500-Level5 showing similar patterns.

## 1046 E Prompts

### Hint-Prompt and Hint-Engineering Prompt

Given a mathematical problem, follow the instructions below to solve it.

Instructions:

When solving mathematical problems, you should leverage both natural language reasoning and interactive Python code execution. Your goal is to provide clear, detailed explanations while utilizing Python to perform complex calculations, symbolic manipulations, data analysis, or any other tasks that can aid in problem-solving. Follow these guidelines to ensure a coherent and effective response:

#### 1. Natural Language Reasoning:

- Provide comprehensive, step-by-step explanations of your thought process.
- Ensure that each step logically follows from the previous one, maintaining clarity and coherence.
- Use appropriate mathematical terminology and notation where necessary.
- Planning, Modeling, and Analysis:

- Use natural language to outline the overall approach to the problem.
- Develop mathematical models or representations as needed.
- Analyze the problem to determine the best strategies for finding a solution.

#### 2. Inserting Python Code Blocks:

- When a Python code snippet can aid in analysis, computation, or symbolic manipulation, insert a Python code block.
- Use triple backticks with 'python' to denote the start of a Python code block and triple backticks to close it.
- Example:  
"""python

1048

””

### 3. Displaying Code Output:

- Immediately after a Python code block, present the output generated by the code.
- Use triple backticks with 'output' to denote the start of the output block and triple backticks to close it.

- Example:

"""output

"""

### 4. Encouraging Multiple Python Calls and Diverse Functionality:

- Utilize Python multiple times throughout your solution to handle different aspects of the problem.
- Take advantage of various Python libraries and functionalities such as:
  - 'numpy' for numerical computations
  - 'scipy' for scientific computing and advanced mathematical functions
  - 'sympy' for symbolic mathematics
  - 'pandas' for data manipulation and analysis
  - 'math' for fundamental mathematical operations
  - 'statistics' for statistical computations
  - 'fractions' for rational number calculations
- Ensure that each Python snippet is purposeful and enhances the understanding or resolution of the problem.
- **Specific Calculations and Complex Operations:**
  - Use Python to perform detailed calculations that would be cumbersome by hand.
  - Implement complex algorithms or data processing tasks that facilitate the solution.
  - Handle any intricate operations that support the overall analysis and modeling of the problem

Problem:

1049

## Code Behavior Analysis Prompt

You are an expert in analyzing code and understanding its purpose, especially within the context of mathematical problem-solving. Your task is to analyze Python code snippets within a solution to a mathematical problem and classify each snippet based on its purpose.

You will be given a problem/solution pair. The solution may contain multiple Python code snippets. For each Python code snippet, you must determine:

### 1. Is it Verification or Calculation?

- **Verification:** The Python code *verifies* a result or conclusion that was already reached through reasoning in the solution. The Python code confirms a pre-existing answer or property.
- **Calculation:** The Python code *calculates* a result that was NOT explicitly present in the solution's reasoning up to that point. The Python code derives a new, previously unknown answer or intermediate value.

2. **What is the specific function of the Python code snippet?** Choose one or more from the following list of functions (be as specific as possible). If none of these functions are appropriate, provide a brief (one sentence) description of the function of the code.

### 1. Solving Equations and Systems of Equations

- Finding numerical or symbolic solutions to algebraic, differential, and other types of equations.

### 2. Symbolic Mathematics and Manipulation

- Performing algebraic operations such as differentiation, integration, simplification, and

1050

expansion using symbolic math libraries like SymPy.

### **3. Numerical Approximation Methods**

- Approximating solutions for problems that lack analytical solutions, including numerical integration, root finding, and solving differential equations.

### **4. Data Visualization and Plotting**

- Creating graphs, charts, and other visual representations using libraries like Matplotlib and Seaborn to illustrate mathematical concepts and data patterns.

### **5. Pattern Recognition and Analysis**

- Identifying and analyzing patterns or relationships in data using statistical and machine learning techniques.

### **6. Optimization and Solution Searching**

- Implementing algorithms to find optimal solutions to problems, including linear programming, integer programming, and heuristic methods.

### **7. Property Verification and Theorem Checking**

- Verifying mathematical properties and theorems for given inputs using computational methods.

### **8. Modular Arithmetic and Number Theory Operations**

- Performing calculations involving modular arithmetic, such as finding inverses, solving congruences, and applying the Chinese Remainder Theorem.

### **9. Prime Number Testing and Factorization**

- Determining the primality of numbers and performing prime factorization using efficient algorithms.

### **10. Geometric and Computational Geometry Calculations**

- Calculating areas, volumes, distances, angles, convex hulls, intersections, and performing geometric transformations.

### **11. Probability, Statistics, and Simulations**

- Computing probabilities, expected values, variances, and running Monte Carlo simulations to model random processes.

### **12. Linear Algebra: Matrix and Vector Operations**

- Performing matrix multiplication, inversion, eigenvalue decomposition, and other linear algebra operations using libraries like NumPy and SciPy.

### **13. Data Generation and Simulation**

- Creating synthetic data sets and simulating mathematical models to explore and analyze behaviors.

### **14. Combinatorial Enumeration and Game Theory**

- Counting permutations, combinations, and analyzing combinatorial games to determine winning strategies.

### **15. Graph Theory Algorithms**

- Implementing algorithms for graph traversal (DFS, BFS), shortest paths (Dijkstra's, Floyd-Warshall), and finding minimum spanning trees (Kruskal's, Prim's).

### **16. Dynamic Programming and Recurrence Relations**

- Designing dynamic programming solutions and solving linear and non-linear recurrence

relations to find closed-form expressions.

**17. Fast Fourier Transforms (FFT) and Signal Processing**

- Utilizing FFT for problems involving polynomial multiplication, number-theoretic transforms, and analyzing frequency components.

**18. Boolean Algebra and Logic Operations**

- Manipulating and simplifying logical expressions, constructing truth tables, and solving Boolean equations.

**19. Big Integer and Arbitrary-Precision Arithmetic**

- Handling calculations with very large integers beyond standard data type limits using Python's arbitrary-precision capabilities.

**20. Symbolic Integration, Differentiation, and Proof Verification**

- Performing advanced calculus operations and assisting in verifying mathematical proofs using symbolic computation libraries.

**21. Linear Programming and Optimization Techniques**

- Formulating and solving linear optimization problems using libraries like PuLP and SciPy.

**22. Algorithm Optimization and Numerical Stability**

- Enhancing algorithm performance by improving time and space complexity and ensuring numerical stability for accurate results.

**23. Automated Theorem Proving and Symbolic Logic**

- Utilizing tools and libraries to automatically prove mathematical theorems and manipulate symbolic logic statements.

**24. Data Structures Implementation and Management**

- Creating and utilizing advanced data structures such as trees, graphs, and heaps to efficiently solve competition problems.

**25. Fractal and Recursive Pattern Generation**

- Creating and analyzing fractals and other recursive patterns relevant to geometry and combinatorics problems.

You will be given a "Problem" and a "Solution". The solution may contain one or more "Python code" snippets. For *each* Python code snippet, provide the following output:

Python Code idx: [The idx of Python code](for example 1,2,3)

Classification: [Verification or Calculation]

Function: [one or more specific functions from the list above OR some one-sentence descriptions]

Problem:

Solution:

## 1053 F Case Study

### 1054 E.1 5 Samples of $D_{Hint-engineering-SFT}$

#### Sample 1

##### **Problem:**

Find the least positive integer  $n$  for which  $2^n + 5^n - n$  is a multiple of 1000.

##### **Solution:**

1055 Let's solve this step by step. The problem is to find the least positive integer  $n$  such that  $2^n + 5^n - n \equiv 0 \pmod{1000}$ .

Since  $1000 = 8 \times 125$ , by the Chinese Remainder Theorem, this is equivalent to solving:

$$2^n + 5^n - n \equiv 0 \pmod{8}$$

$$2^n + 5^n - n \equiv 0 \pmod{125}$$

For modulo 8: - When  $n \geq 3$ :  $2^n \equiv 0 \pmod{8}$  -  $5^n \pmod{8}$  cycles every 2: 5, 1, 5, 1, ... - After analysis, we find  $n \equiv 5 \pmod{8}$

For modulo 125, let's first find the period of  $2^n \pmod{125}$ :

#### Python Code 1

```
def find_period_mod125():
    seen_values = {}
    current_value = 1
    position = 0
    sequence = []

    while True:
        if current_value in seen_values:
            period_length = position - seen_values[current_value]
            period_sequence = sequence[seen_values[current_value]...]
            return period_length, period_sequence

        seen_values[current_value] = position
        sequence.append(current_value)
        current_value = (current_value * 2) % 125
        position += 1

    period_length, period_sequence = find_period_mod125()
    print(f"Period length: {period_length}")

    print("\nExample cases:")
    test_numbers = [0, 1, 2, period_length-1]
    for n in test_numbers:
        result = pow(2, n, 125)
        print(f"2^{n} mod 125 = {result}")
```

#### Output 1

Period length: 100

Example cases:

$2^0 \pmod{125} = 1$

$2^1 \pmod{125} = 2$

$2^2 \pmod{125} = 4$

$2^{99} \pmod{125} = 63$

1056



Similarly, let's check the period of  $6^k \bmod 125$ :

#### Python Code 2

```
def find_period_mod125():
    seen_values = {}
    current_value = 1
    position = 0
    sequence = []

    while True:
        if current_value in seen_values:
            period_length = position - seen_values[current_value]
            period_sequence = sequence[seen_values[current_value]...]
            return period_length, period_sequence

        seen_values[current_value] = position
        sequence.append(current_value)
        current_value = (current_value * 6) % 125
        position += 1

period_length, period_sequence = find_period_mod125()
print(f"Period length: {period_length}")

print("\nExample cases:")
test_numbers = [0, 1, 2, period_length-1]
for n in test_numbers:
    result = pow(6, n, 125)
    print(f"6^{n} mod 125 = {result}")
```

#### Output 2

Period length: 25

Example cases:

$6^0 \bmod 125 = 1$

$6^1 \bmod 125 = 6$

$6^2 \bmod 125 = 36$

$6^{24} \bmod 125 = 21$

[...detailed analysis omitted...]

After analysis, we need to solve:

$$32 \cdot 6^k \equiv 8k + 5 \pmod{125}$$

Let's find the solution:

### Python Code 3

```
def find_k():
    for k in range(0, 150):
        mod_6k = pow(6, k, 125)
        lhs = (32 * mod_6k) % 125
        rhs = (8*k + 5) % 125
        if lhs == rhs:
            print(f"Found k={k}, n=8*{k}+5={8*k+5}")
            return 8*k+5
    return None

result = find_k()
print(result)
```

### Output 3

```
Found k=99, n=8*99+5=797
797
```

Therefore,  $k = 99$  gives us  $n = 8 \times 99 + 5 = 797$ .

Verification:  $-5^{797} \equiv 125 \pmod{1000}$  (since  $5^n$  cycles 125, 625 for odd/even  $n \geq 3$ ) -  $2^{797} \equiv 672 \pmod{1000}$  - Therefore,  $2^{797} + 5^{797} - 797 \equiv 0 \pmod{1000}$

The answer is 797.

1058

### Sample 2

#### **Problem:**

Find the largest prime number  $p < 1000$  for which there exists a complex number  $z$  satisfying: (1) the real and imaginary part of  $z$  are both integers; (2)  $|z| = \sqrt{p}$ , and (3) there exists a triangle whose three side lengths are  $p$ , the real part of  $z^3$ , and the imaginary part of  $z^3$ .

#### **Solution:**

Let's try to solve this problem step by step. The goal is to find the largest prime number  $p < 1000$  such that there exists a complex number  $z$  with integer real and imaginary parts,  $|z| = \sqrt{p}$ , and there's a triangle with side lengths  $p$ ,  $\text{Re}(z^3)$ , and  $\text{Im}(z^3)$ .

First, let's understand the problem. We need to find a prime  $p < 1000$ . The complex number  $z$  must have integer real and imaginary parts, so  $z = a + bi$  where  $a$  and  $b$  are integers. The magnitude  $|z|$  is  $\sqrt{a^2 + b^2} = \sqrt{p}$ , which implies that  $a^2 + b^2 = p$ . Therefore,  $p$  must be a prime that can be expressed as the sum of two squares. That's a key point.

[...detailed analysis omitted...]

So the algorithm we will implement is:

For each prime  $p$  (starting from largest to smallest):

- Find  $(a, b)$  using `find_a_b(p)`
- Generate all variations:  
 $[(a, b), (-a, b), (a, -b), (-a, -b), (b, a), (-b, a), (b, -a), (-b, -a)]$
- For each variation  $(x, y)$ :
  - Compute  $\text{Re} = x^3 - 3xy^2$
  - Compute  $\text{Im} = 3x^2y - y^3$
  - If  $\text{Re} > 0$  and  $\text{Im} > 0$ :
    - \* Check triangle inequalities:
      - $p + \text{Re} > \text{Im}$
      - $p + \text{Im} > \text{Re}$
      - $\text{Re} + \text{Im} > p$

1059

\* If all three are true, then return  $p$  as a valid solution

Let's implement this in Python:

#### Python Code

```
import math

def sieve(n):
    sieve = [True] * (n + 1)
    sieve[0] = sieve[1] = False
    for i in range(2, int(math.sqrt(n)) + 1):
        if sieve[i]:
            sieve[i * i : n + 1 : i] = ...
    primes = [i for i, is_prime in enumerate(sieve) if is_prime]
    return primes

def find_a_b(p):
    max_a = int(math.isqrt(p))
    for a in range(max_a + 1):
        b_sq = p - a * a
        if b_sq < 0:
            continue
        b = int(math.isqrt(b_sq))
        if b * b == b_sq:
            return (a, b)
    return None

def is_triangle(p, re, im):
    return (re + im > p) and (p + re > im) and (p + im > re)

def check_primes_for_triangle():
    eligible_primes = ...
    eligible_primes.sort(reverse=True)

    for p in eligible_primes:
        ab = find_a_b(p)
        if ab is None:
            continue
        a, b = ab
        variations = [
            (a, b), (-a, b), (a, -b), (-a, -b),
            (b, a), (-b, a), (b, -a), (-b, -a)
        ]

        for x, y in variations:
            re = x ** 3 - 3 * x * y ** 2
            im = 3 * x ** 2 * y - y ** 3
            if re > 0 and im > 0:
                if is_triangle(p, re, im):
                    print(f"Found valid prime ...")
                    print(f"Checking triangle inequalities: ...")
                    print(f"Answer: {p}")
                    return

    check_primes_for_triangle()
```

### Output

```
Found valid prime 349 with (x,y)=(-5,-18), re=4735, im=4482
Checking triangle inequalities: True, True, True
Answer: 349
```

Therefore, the largest prime that satisfies all conditions is 349.

1061

### Sample 3

#### **Problem:**

Each face of two noncongruent parallelepipeds is a rhombus whose diagonals have lengths  $\sqrt{21}$  and  $\sqrt{31}$ . The ratio of the volume of the larger of the two polyhedra to the volume of the smaller is  $\frac{m}{n}$ , where  $m$  and  $n$  are relatively prime positive integers. Find  $m + n$ . A parallelepiped is a solid with six parallelogram faces such as the one shown below.

#### **Solution:**

Let's try to solve this problem step by step. The problem is about two noncongruent parallelepipeds where each face is a rhombus with diagonals of lengths  $\sqrt{21}$  and  $\sqrt{31}$ . We need to find the ratio of their volumes (larger to smaller) and then compute  $m + n$  where the ratio is  $\frac{m}{n}$  in simplest terms.

[...detailed analysis omitted...]

Therefore, the two possible rhombohedrons would have all angles equal to  $\arccos(5/26)$  or  $\arccos(-5/26)$ . Thus, these are two distinct rhombohedrons with the same edge length but different angles, hence noncongruent.

Let's compute the volumes using Python:

#### Python Code

```
import sympy as sp

# Define the square root of 13 symbolically
s = sp.sqrt(13)

# Define angles symbolically using arccos
theta = sp.acos(sp.Rational(5, 26))
theta_prime = sp.acos(sp.Rational(-5, 26))

# Define cos(theta) and cos(theta_prime) as symbolic fractions
cos_theta = sp.Rational(5, 26)
cos_theta_prime = sp.Rational(-5, 26)

# Compute volume for theta using the symbolic expression
vol1_expr = s**3 * sp.sqrt(1 - 3*cos_theta**2 + 2*cos_theta**3)
vol1 = sp.simplify(vol1_expr)

# Compute volume for theta_prime using the symbolic expression
vol2_expr = s**3 * sp.sqrt(1 - 3*cos_theta_prime**2 + ...)
vol2 = sp.simplify(vol2_expr)

# Print the symbolic results
print("Volume 1:", vol1)
print("Volume 2:", vol2)
```

1062

## Output

Volume 1:  $63\sqrt{2}/2$   
 Volume 2:  $31\sqrt{2}$

The two volumes are  $\frac{63\sqrt{2}}{2}$  and  $31\sqrt{2}$ . Since  $\frac{63}{2} = 31.5 > 31$ ,  $\frac{63\sqrt{2}}{2}$  is larger than  $31\sqrt{2}$ .  
 Therefore,  $\frac{m}{n} = \frac{63}{62}$ . Since  $63 = 7 \times 9$  and  $62 = 2 \times 31$ , they are coprime. So  $m = 63$ ,  $n = 62$ ,  
 and  $m + n = 125$ .  
 Therefore, the answer is  $\boxed{125}$ .

## Sample 4

**Problem:**

Let  $\triangle ABC$  be an equilateral triangle with side length 55. Points  $D$ ,  $E$ , and  $F$  lie on  $\overline{BC}$ ,  $\overline{CA}$ , and  $\overline{AB}$ , respectively, with  $BD = 7$ ,  $CE = 30$ , and  $AF = 40$ . Point  $P$  inside  $\triangle ABC$  has the property that

$$\angle AEP = \angle BFP = \angle CDP.$$

Find  $\tan^2(\angle AEP)$ .

**Solution:**

Let's try to solve this problem step by step. We have an equilateral triangle  $ABC$  with side length 55. Points  $D$ ,  $E$ ,  $F$  are on  $BC$ ,  $CA$ ,  $AB$  respectively, with  $BD=7$ ,  $CE=30$ ,  $AF=40$ . There's a point  $P$  inside the triangle such that the angles  $\angle AEP$ ,  $\angle BFP$ , and  $\angle CDP$  are equal. We need to find the square of the tangent of this angle.

First, let's place the triangle  $ABC$  in a coordinate system with  $A(0,0)$ ,  $B(55,0)$ , and  $C(\frac{55}{2}, \frac{55\sqrt{3}}{2})$ . Then we can calculate the coordinates of points  $D$ ,  $E$ , and  $F$ :

- Point  $D$ :  $D(\frac{103}{2}, \frac{7\sqrt{3}}{2})$  - Point  $E$ :  $E(\frac{25}{2}, \frac{25\sqrt{3}}{2})$  - Point  $F$ :  $F(40,0)$

[...detailed analysis omitted...]

For each angle  $\theta$ , we can write equations involving the slopes of the lines:

1. For  $\angle AEP$ :

$$\tan(\theta) = \frac{\frac{y - \frac{25\sqrt{3}}{2}}{x - \frac{25}{2}} - \sqrt{3}}{1 + \sqrt{3} \cdot \frac{y - \frac{25\sqrt{3}}{2}}{x - \frac{25}{2}}}$$

2. For  $\angle BFP$ :

$$\tan(\theta) = \frac{y}{x - 40}$$

3. For  $\angle CDP$ :

$$\tan(\theta) = \frac{\frac{y - \frac{7\sqrt{3}}{2}}{x - \frac{103}{2}} + \sqrt{3}}{1 - \sqrt{3} \cdot \frac{y - \frac{7\sqrt{3}}{2}}{x - \frac{103}{2}}}$$

Let's solve this system using Python:

### Python Code

```
import sympy as sp

# Define variables
x, y = sp.symbols('x y')

# Coordinates of points
E_x = sp.Rational(25, 2)
E_y = sp.Rational(25, 2) * sp.sqrt(3)
F_x = sp.Rational(40, 1)
F_y = sp.Rational(0, 1)
D_x = sp.Rational(103, 2)
D_y = sp.Rational(7, 2) * sp.sqrt(3)

# Slopes and tan(theta) expressions
m_EA = sp.sqrt(3)
m_EP = (y - E_y) / (x - E_x)
tan_theta_E = ...

# Solve the system of equations
solution = sp.solve([eq1, eq2], (x, y))
print("Solutions for x and y:")
print(solution)
```

### Output

```
Solutions for x and y:
[(1525/38, 25*sqrt(3)/38)]
```

With these coordinates, we can compute  $\tan(\theta)$ :

$$\tan(\theta) = \frac{\frac{25\sqrt{3}}{38}}{\frac{1525}{38} - 40} = 5\sqrt{3}$$

$$\text{Therefore: } \tan^2(\theta) = (5\sqrt{3})^2 = 75$$

Therefore, the answer is  $\boxed{75}$ .

1065

### Sample 5

#### **Problem:**

In  $\triangle ABC$  with side lengths  $AB = 13$ ,  $BC = 14$ , and  $CA = 15$ , let  $M$  be the midpoint of  $\overline{BC}$ . Let  $P$  be the point on the circumcircle of  $\triangle ABC$  such that  $M$  is on  $\overline{AP}$ . There exists a unique point  $Q$  on segment  $\overline{AM}$  such that  $\angle PBQ = \angle PCQ$ . Then  $AQ$  can be written as  $\frac{m}{\sqrt{n}}$ , where  $m$  and  $n$  are relatively prime positive integers. Find  $m + n$ .

#### **Solution:**

Let's solve this step by step. First, let's establish a coordinate system: - Place B at (0,0) - Place C at (14,0) - Then M is at (7,0) - Using distances  $AB=13$  and  $AC=15$ , we can find A at (5,12)

[...detailed analysis omitted...]

First, let's find the circumcircle of triangle ABC:

1066



#### Python Code 1

```
import sympy as sp

# Define symbols for the circle's center (h, k) and radius r
h, k, r = sp.symbols('h k r')

# Points A(5,12), B(0,0), C(14,0)
# Equations for the circle passing through each point
eq1 = (0 - h)**2 + (0 - k)**2 - r**2 # B(0,0)
eq2 = (5 - h)**2 + (12 - k)**2 - r**2 # A(5,12)
eq3 = (14 - h)**2 + (0 - k)**2 - r**2 # C(14,0)

# Subtract equations to eliminate r^2
eq21 = sp.simplify(eq2 - eq1)
eq31 = sp.simplify(eq3 - eq1)

# Solve the system of equations
solution = sp.solve([eq21, eq31], (h, k))
h_value, k_value = solution[h], solution[k]
print("Center (h, k):", (h_value, k_value))

radius_eq = eq1.subs({h: h_value, k: k_value})
radius_solution = sp.solve(radius_eq, r)
r_value = [r_val for r_val in radius_solution if r_val > 0]
print("Radius r:", r_value)
```

#### Output 1

```
Center (h, k): (7, 33/8)
Radius r: [65/8]
```

[...detailed analysis omitted...]

Next, let's find point P by finding where line AM intersects the circumcircle:

1067

### Python Code 2

```
from sympy import symbols, solve, Rational

# Define the variable
t = symbols('t')

# Define the parametric equations for x and y
x = 5 + 2*t
y = 12 - 12*t

# Define the equation of the circle
circle_eq = (x - 7)**2 + ...

# Solve for t
expanded_eq = circle_eq.expand()
solution_t = solve(expanded_eq, t)

# Calculate the coordinates for each solution t
points = []
for t_solution in solution_t:
    x_value = x.subs(t, t_solution)
    y_value = y.subs(t, t_solution)
    points.append((x_value, y_value))

print("Solutions for t:", solution_t)
for idx, point in enumerate(points):
    print(f"Coordinates of point for t={solution_t[idx]}...")
```

### Output 2

```
Solutions for t: [0, 197/148]
Coordinates of point for t=0: (x, y) = (5, 12)
Coordinates of point for t=197/148: (x, y) = (567/74, -147/37)
```

[...detailed analysis omitted...]

Now, let's find point Q using the condition that  $\angle PBQ = \angle PCQ$ :

1068

### Python Code 3

```
from sympy import symbols, Eq, solve, sqrt, simplify, fraction
from sympy import Rational

t = symbols('t')

# Coordinates of Q
Qx = 5 + 2*t
Qy = 12 - 12*t

# Coordinates of P
Px = Rational(567, 74)
Py = Rational(-147, 37)

# Vectors BP, BQ, CP, CQ
BPx = Px - 0
BPy = Py - 0
BQx = Qx - 0
BQy = Qy - 0

CPx = Px - 14
CPy = Py - 0
CQx = Qx - 14
CQy = Qy - 0

# Compute dot products and magnitudes
dot_BP_BQ = BPx * BQx + BPy * BQy
dot_CP_CQ = CPx * CQx + CPy * CQy

magnitude_BP = sqrt(BPx**2 + BPy**2)
magnitude_BQ = sqrt(BQx**2 + BQy**2)
magnitude_CP = sqrt(CPx**2 + CPy**2)
magnitude_CQ = sqrt(CQx**2 + CQy**2)

# Set up and solve the equation
equation = Eq(dot_BP_BQ/(magnitude_BP * magnitude_BQ),
               dot_CP_CQ/(magnitude_CP * magnitude_CQ))
solution = solve(equation, t)

print("Solutions for t:", solution)
```

### Output 3

```
Solutions for t: [99/148, 197/148]
```

[...detailed analysis omitted...]

Finally, let's compute  $AQ$  and verify our answer:

#### Python Code 4

```
from math import gcd

# First compute AQ distance
Qx_val = Qx.subs(t, Rational(99,148))
Qy_val = Qy.subs(t, Rational(99,148))
AQ_distance = sqrt((Qx_val - 5)**2 + (Qy_val - 12)**2)
simplified_AQ = AQ_distance.simplify()
print("AQ =", simplified_AQ)

# Verify m and n are coprime
m = 99
n = 148
gcd_val = gcd(m, n)
print("GCD of 99 and 148:", gcd_val)
```

#### Output 4

```
AQ = 99*sqrt(37)/74
GCD of 99 and 148: 1
```

After manipulation, we find  $AQ = \frac{99}{\sqrt{148}}$  where  $m = 99$  and  $n = 148$  are coprime positive integers.

Therefore,  $m + n = 99 + 148 = \boxed{247}$ .

1070

## 1071 F.2 Test case of Prompt-Hint-SFT-32B

#### A case from AIME24

##### **Problem:**

Let  $\mathcal{B}$  be the set of rectangular boxes with surface area 54 and volume 23. Let  $r$  be the radius of the smallest sphere that can contain each of the rectangular boxes that are elements of  $\mathcal{B}$ . The value of  $r^2$  can be written as  $\frac{p}{q}$ , where  $p$  and  $q$  are relatively prime positive integers. Find  $p + q$ .

##### **Solution:**

The problem is about finding the smallest sphere that can contain any rectangular box from the set  $\mathcal{B}$ , where each box has a surface area of 54 and volume 23. The radius of this minimal sphere would be half of the maximum space diagonal among all possible boxes.

For a box with side lengths  $a, b, c$ , we have: 1. Space diagonal  $d = \sqrt{a^2 + b^2 + c^2}$  2. Surface area:  $2(ab + bc + ac) = 54$  3. Volume:  $abc = 23$

Therefore,  $r^2 = \frac{a^2 + b^2 + c^2}{4}$ , and we need to maximize  $a^2 + b^2 + c^2$  subject to the constraints. [...detailed analysis omitted...]

Let's approach this using Lagrange multipliers. Our Lagrangian is:

$$L = a^2 + b^2 + c^2 - \lambda(2(ab + bc + ac) - 54) - \mu(abc - 23)$$

Taking partial derivatives:

$$\frac{\partial L}{\partial a} = 2a - \lambda(2b + 2c) - \mu bc = 0$$

$$\frac{\partial L}{\partial b} = 2b - \lambda(2a + 2c) - \mu ac = 0$$

$$\frac{\partial L}{\partial c} = 2c - \lambda(2a + 2b) - \mu ab = 0$$

1072

[...detailed analysis omitted...]

After analysis, we find that the maximum occurs when:  $-a = b = 2 - c = \frac{23}{4}$   
Let's verify this solution:

#### Python Code

```
from sympy import symbols, Eq, solve, sqrt
from sympy import Rational

# Define variables
a = 2
b = 2
c = Rational(23, 4)

# Check surface area
surface_area = 2 * (a*b + b*c + a*c)
print(f"Surface area = {surface_area}")

# Check volume
volume = a * b * c
print(f"Volume = {volume}")

# Calculate space diagonal squared
diagonal_squared = a**2 + b**2 + c**2
print(f"Space diagonal squared = {diagonal_squared}")

# Calculate r squared
r_squared = diagonal_squared / 4
print(f"r squared = {r_squared}")
```

#### Output

```
Surface area = 54
Volume = 23
Space diagonal squared = 657/16
r squared = 657/64
```

Therefore: - Space diagonal squared =  $\frac{657}{16} - r^2 = \frac{657}{64}$

Since  $657 = 3 \times 3 \times 73$  and  $64 = 2^6$ , these numbers are coprime. Therefore,  $p = 657$  and  $q = 64$ .

The answer is  $p + q = 657 + 64 = \boxed{721}$ .

1073

#### A Case from AIME25

##### **Problem:**

Six points  $A, B, C, D, E$  and  $F$  lie in a straight line in that order. Suppose that  $G$  is a point not on the line and that  $AC = 26$ ,  $BD = 22$ ,  $CE = 31$ ,  $DF = 33$ ,  $AF = 73$ ,  $CG = 40$ , and  $DG = 30$ . Find the area of  $\triangle BGE$ .

##### **Solution:**

Let's solve this step by step:

1) First, let's assign coordinates to the points on the line, placing  $A$  at origin: -  $A$ : 0 (origin) -  $AF = 73$ , so  $F$ : 73 -  $AC = 26$ , so  $C$ : 26 -  $CE = 31$ , so  $E$ :  $26 + 31 = 57$  -  $DF = 33$ , so  $D$ :  $73 - 33 = 40$  -  $BD = 22$ , so  $B$ :  $40 - 22 = 18$

[...detailed analysis omitted...]

2) Next, let's find coordinates of  $G$  using distances  $CG = 40$  and  $DG = 30$ : - From  $C(26,0)$ :  $(x_G - 26)^2 + y_G^2 = 1600$  ...(1) - From  $D(40,0)$ :  $(x_G - 40)^2 + y_G^2 = 900$  ...(2)

1074

Let's verify this using Python:

#### Python Code

```
from sympy import symbols, Eq, solve

x_G, y_G = symbols('x_G y_G')

# Equations based on CG = 40 and DG = 30
eq1 = Eq((x_G - 26)**2 + y_G**2, 1600)
eq2 = Eq((x_G - 40)**2 + y_G**2, 900)

# Subtract equations to find x_G
subtracted_eq = Eq((x_G - 26)**2 - (x_G - 40)**2, 700)
x_G_val = solve(subtracted_eq, x_G)[0]

# Substitute x_G into eq2 to find y_G
y_G_val = solve(eq2.subs(x_G, x_G_val), y_G)[0]

print(f"G coordinates: ({x_G_val}, {y_G_val})")
```

#### Output

G coordinates: (58, 24)

Therefore, the coordinates of the triangle vertices are: - B(18,0) - G(58,24) - E(57,0)

3) Calculate the area using the shoelace formula:  $\text{Area} = \frac{1}{2}|x_1(y_2 - y_3) + x_2(y_3 - y_1) + x_3(y_1 - y_2)|$

Where:  $-(x_1, y_1) = (18, 0) - (x_2, y_2) = (58, 24) - (x_3, y_3) = (57, 0)$

Substituting:

$$\begin{aligned}\text{Area} &= \frac{1}{2}|18(24 - 0) + 58(0 - 0) + 57(0 - 24)| \\ &= \frac{1}{2}|432 + 0 - 1368| \\ &= \frac{1}{2}|-936| \\ &= 468\end{aligned}$$

Therefore, the area of triangle BGE is 468.

1075

### 1076 F.3 Test case of Hint-Engineering-RFT-32B

#### A Case form AIME24

##### **Problem:**

Let  $\mathcal{B}$  be the set of rectangular boxes with surface area 54 and volume 23. Let  $r$  be the radius of the smallest sphere that can contain each of the rectangular boxes that are elements of  $\mathcal{B}$ . The value of  $r^2$  can be written as  $\frac{p}{q}$ , where  $p$  and  $q$  are relatively prime positive integers. Find  $p + q$ .

##### **Solution:**

The radius of the smallest sphere that can contain any rectangular box must be half of the maximum space diagonal. For a box with dimensions  $a, b, c$ , we have:

1. Space diagonal  $= \sqrt{a^2 + b^2 + c^2}$  2. Surface area:  $2(ab + bc + ac) = 54$  3. Volume:  $abc = 23$

Our goal is to maximize  $a^2 + b^2 + c^2$  subject to these constraints, then  $r^2 = \frac{\max(a^2 + b^2 + c^2)}{4}$ .

1077



Let's try assuming  $a = b$  to simplify the problem: - Surface area becomes:  $2(a^2 + 2ac) = 54 \rightarrow a^2 + 2ac = 27$  - Volume becomes:  $a^2c = 23 \rightarrow c = \frac{23}{a^2}$

[...detailed analysis omitted...]

Let's solve the resulting cubic equation:

#### Python Code 1

```
from sympy import symbols, solve, Eq

a = symbols('a')
equation = Eq(a**3 - 27*a + 46, 0)
solutions = solve(equation, a)
print("Solutions:")
for sol in solutions:
    print(sol.simplify())
```

#### Output 1

```
Solutions:
2
-1 + 2*sqrt(6)
-2*sqrt(6) - 1
```

The only valid solution is  $a = 2$ , giving us:  $-a = b = 2 - c = \frac{23}{4} = 5.75$   
Let's verify this is indeed the maximum using numerical optimization:

#### Python Code 2

```
from scipy.optimize import minimize

def objective(x):
    a, b, c = x
    return -(a**2 + b**2 + c**2)

def constraint1(x):
    a, b, c = x
    return 2*(a*b + b*c + a*c) - 54

def constraint2(x):
    a, b, c = x
    return a*b*c - 23

x0 = [2, 2, 5.75]
cons = [{'type': 'eq', 'fun': constraint1},
        {'type': 'eq', 'fun': constraint2}]
bounds = [(0.0001, None), (0.0001, None), (0.0001, None)]

result = minimize(objective, x0, method='SLSQP',
                  bounds=bounds, constraints=cons)

print("Optimization result:", result.success)
print("Optimal a, b, c:", result.x)
print("Maximum  $a^2 + b^2 + c^2$ :", -result.fun)
```

### Output 2

```

Optimization result: True
Optimal a, b, c: [2.    2.    5.75]
Maximum a2 + b2 + c2: 41.0625

```

Therefore: 1. Maximum space diagonal squared =  $\frac{657}{16}$  2.  $r^2 = \frac{657}{16}/4 = \frac{657}{64}$  3.  $657 = 3 \times 3 \times 73$  and  $64 = 2^6$  are coprime 4. Thus,  $p = 657$  and  $q = 64$   
 The answer is  $p + q = 657 + 64 = \boxed{721}$ .

1079

### A Case from AIME25

#### Problem:

Six points  $A, B, C, D, E$  and  $F$  lie in a straight line in that order. Suppose that  $G$  is a point not on the line and that  $AC = 26, BD = 22, CE = 31, DF = 33, AF = 73, CG = 40$ , and  $DG = 30$ . Find the area of  $\triangle BGE$ .

#### Solution:

First, let's assign coordinates to all points on the line, placing  $A$  at origin:

Given distances: -  $AC = 26$  -  $BD = 22$  -  $CE = 31$  -  $DF = 33$  -  $AF = 73$

This allows us to determine coordinates: -  $A: (0, 0)$  -  $B: (18, 0)$  -  $C: (26, 0)$  -  $D: (40, 0)$  -  $E: (57, 0)$  -  $F: (73, 0)$

[...detailed analysis omitted...]

To find  $G$ 's coordinates, we use distances  $CG = 40$  and  $DG = 30$ :

1) From  $C (26, 0)$ :  $(x_G - 26)^2 + y_G^2 = 1600$  ... (1) 2) From  $D (40, 0)$ :  $(x_G - 40)^2 + y_G^2 = 900$  ... (2)

Let's solve this system using Python:

### Python Code 1

```

from sympy import symbols, Eq, solve

x_G, y_G = symbols('x_G y_G')

# Equations based on CG = 40 and DG = 30
eq1 = Eq((x_G - 26)**2 + y_G**2, 1600)
eq2 = Eq((x_G - 40)**2 + y_G**2, 900)

# Solve for x_G and y_G
subtracted_eq = Eq((x_G - 26)**2 - (x_G - 40)**2, 700)
x_G_val = solve(subtracted_eq, x_G)[0]
y_G_val = solve(eq2.subs(x_G, x_G_val), y_G)[0]

print(f"G coordinates: ({x_G_val}, {y_G_val})")

```

### Output 1

```
G coordinates: (58, 24)
```

Therefore, we have all coordinates: -  $B: (18, 0)$  -  $G: (58, 24)$  -  $E: (57, 0)$   
 Let's calculate the area using the shoelace formula:

1080

#### Python Code 2

```
# Calculate area using shoelace formula
B_coord = (18, 0)
G_coord = (58, 24)
E_coord = (57, 0)

area = 0.5 * abs(
    B_coord[0] * (G_coord[1] - E_coord[1]) +
    G_coord[0] * (E_coord[1] - B_coord[1]) +
    E_coord[0] * (B_coord[1] - G_coord[1])
)

print(f"Area of triangle BGE: {area}")
```

#### Output 2

Area of triangle BGE: 468.0

Verification using Base  $\times$  Height method: - Base (BE) =  $57 - 18 = 39$  - Height = 24 - Area =  $\frac{39 \times 24}{2} = 468$

Therefore, the area of triangle BGE is 468.

1081

## 1082 G Stron-to-Weak Distillation Data

1083 For the strong-to-weak distillation process, we constructed a comprehensive mathematical problem  
1084 dataset of approximately 10,000 problems from three primary sources. The dataset comprises  
1085 800 problems from AIME (American Invitational Mathematics Examination) competitions prior  
1086 to 2024, 2,280 problems from the MATH [65] dataset’s training set (Level 5), and 7,000 problems  
1087 sampled from the Numina-math [66] collection. For the Numina-math sampling, we implemented  
1088 several filtering criteria: problems containing figures were excluded, as were proof-based problems,  
1089 multiple-choice questions, and problems where answers appeared within the problem statements.  
1090 After applying these filtering criteria, we randomly sampled 7,000 problems to ensure a clean and  
1091 standardized dataset suitable for our distillation training process.

## 1092 H Baselines

1093 We compare our approaches against a range of state-of-the-art mathematical reasoning models across  
1094 different parameter scales:

1095 **SOTA Models.** We benchmark against the most advanced large reasoning models currently avail-  
1096 able: OpenAI’s o1 [5], QwQ-32B [67], and DeepSeek-R1 [7]. These models represent the frontier of  
1097 mathematical reasoning capabilities and serve as an upper bound for performance comparison.

1098 **Frontier Models (32B).** For the 32B parameter scale, we use DeepSeek-R1-32B [7] as our founda-  
1099 tion model since it serves as the starting point for many open-source models in this size range. We also  
1100 compare against contemporary tool-integrated reasoning (TIR) models, including START-32B [19],  
1101 STILL-3-TOOL-32B [15], and ReTool-R1-32B [58], the latter being a concurrent work focusing on  
1102 reinforcement learning for tool use.

1103 **Lightweight Models (1.5B).** In the lightweight category, we use DeepSeek-R1-1.5B [7] as our  
1104 base model for the same reason as its 32B counterpart. We benchmark against DeepScaleR-1.5B-  
1105 Preview [63], the current state-of-the-art reinforcement learning model at this scale, and ToRL-  
1106 1.5B [56], a concurrent work on tool-integrated reasoning with reinforcement learning.

1107 Our selection of baselines spans different model sizes, training methodologies (SFT, RL, and RFT),  
1108 and approaches to mathematical reasoning (with and without explicit tool use). This comprehen-  
1109 sive comparison allows us to evaluate the effectiveness of our Prompt-Hint and Hint-Engineering  
1110 approaches relative to both established benchmarks and recent innovations in the field.

## 1111 **I Broader Impacts**

1112 Our work on enhancing code-integrated reasoning capabilities in LRMs offers several potential  
1113 benefits to society. The improved efficiency and accuracy in mathematical reasoning could enhance  
1114 educational applications and academic research, while reduced token usage contributes to environ-  
1115 mental sustainability through decreased computational resource consumption. The integration of  
1116 precise computational tools with natural language reasoning may also improve the reliability of AI  
1117 systems in applications requiring accurate calculations.

1118 However, as with any advancement in AI capabilities, potential risks should be considered. While  
1119 our models are trained on public mathematical datasets and intended for educational and research  
1120 purposes, the enhanced reasoning capabilities could potentially be misused if not properly secured.  
1121 We recommend implementing appropriate access controls and maintaining transparency about the  
1122 system’s limitations and intended use cases.

1123 We encourage future work to continue exploring responsible deployment strategies that maximize  
1124 beneficial impacts while minimizing potential risks.

## 1125 **J Limitation**

1126 Our work presents a novel framework for enhancing code-integrated reasoning in LRMs through hint-  
1127 engineering and efficient post-training strategies. While we demonstrate significant improvements  
1128 in both performance and efficiency, particularly in mathematical reasoning tasks, several directions  
1129 remain for future exploration. Due to our use of DeepSeek-R1-Distill-Qwen models (32B and  
1130 1.5B), the computational requirements for training and inference may affect broader accessibility.  
1131 While we utilize publicly available datasets and models, ensuring our work maintains transparency  
1132 and reproducibility, the rapid evolution of LRM capabilities suggests opportunities for continued  
1133 enhancement as new architectures emerge. Furthermore, while our current work emphasizes the  
1134 integration of code interpreters within long-form reasoning, there remain opportunities to investigate  
1135 additional synergies between external tools and language models’ inherent reasoning capabilities. As  
1136 the field of large reasoning models continues to advance rapidly, we anticipate further developments  
1137 in optimizing these interactions.
